# Supplementary material for: A fibrous thiazolothiazole-bridged viologen polymer for high-performance lithium-ion batteries
Source: Royal Society of Chemistry journal article supplement (doi:10.1039/d1ta03784f), 2021-01-01
Supplement: d1ta03784f1.pdf [file d1ta03784f1.pdf]

*Electronic Supplementary Information (ESI)*

**Fibrous Thiazolothiazole-bridged Viologen Polymer for  
High-Performance Lithium-Ion Batteries**

Ling Chen,<sup>‡a</sup> Xiaolin Zhu,<sup>‡\*a</sup> Youzhi Zhang,<sup>a</sup> Guangyuan Gao,<sup>a</sup> Wenhao Xue,<sup>a</sup> Sen Zhang,<sup>a</sup> Xiujuan Wang,<sup>a</sup> Qichun Zhang,<sup>b</sup> and Xiaoming He<sup>a\*</sup>

*a. Key Laboratory of Applied Surface and Colloid Chemistry of Ministry of Education, School of Chemistry of Chemical Engineering, Shaanxi Normal University, Xi'an 710119, P.R. China. E-mail: [xiaolinchem@snnu.edu.cn](mailto:xiaolinchem@snnu.edu.cn); [xmhe@snnu.edu.cn](mailto:xmhe@snnu.edu.cn)*

*b. Department of Materials Science and Engineering, City University of Hong Kong, Kowloon, Hong Kong, 999077, China*

<sup>‡</sup> These authors contributed equally to this work

\*Corresponding Author Email: [xiaolinchem@snnu.edu.cn](mailto:xiaolinchem@snnu.edu.cn); [xmhe@snnu.edu.cn](mailto:xmhe@snnu.edu.cn)

## Experimental Section

### Materials and Instruments.

Poly(1,1-difluoroethylene) (PVDF) ( $M_w = 534,000$ ), *N*-methyl-2-pyrrolidinone (NMP) and carbon black (ECP-600JD) were purchased from Shenzhen Kejing Zhida Technology Co., Ltd. Lithium chip, electrolyte, CR2032 battery case and separator were purchased from DoDoChem. Tetrabutylammonium hexafluorophosphate (TBAPF<sub>6</sub>) was purchased from Sigma-Aldrich and recrystallized from EtOH before drying under vacuum before use. All other chemical reagents were purchased from commercial sources (Alfa Aesar, Energy-chemical and Adamas) and were used as received, unless otherwise noted.

The <sup>1</sup>H NMR spectra were recorded on a 400 MHz or 600 MHz Bruker spectrometer. The <sup>13</sup>C NMR spectra were recorded at 100 MHz or 150 MHz. High resolution mass spectrometry (HRMS) data were collected on a Bruker maxis UHR-TOF mass spectrometer in ESI positive mode. The solid-state <sup>13</sup>C NMR spectra were obtained on a JEOL RESONANCE ECZ 400R NMR spectrometer at a MAS rate of 12 kHz. Fourier transform infrared (FT-IR) measurements were carried out using a Bruker Tensor27 spectrophotometer. Powder X-ray diffraction (PXRD) patterns were recorded on Bruker D8 Advance instrument. Brunauer-Emmett-Teller (BET) surface area were measured by Micromeritics ASAP 2460 instrument. Thermo-gravimetric analyses (TGA) were carried out on TA (Q1000DSC+LNCS+FACS Q600SDT) instrument. Surface analyses by X-ray Photoelectron Spectroscopy (XPS) were collected on Kratos AXIS ULTRA. Scanning electron microscope (SEM) images were obtained using a Hitachi SU8220. Transmission electron microscopy (TEM) and HR-TEM images were acquired using FEI (Tecnai G2 F20) instrument. Ultraviolet-visible (UV-vis) absorption spectra were recorded on Cary 3500 spectrometer. Emission spectra and the absolute quantum yield were carried out on Horiba FluoroMax Plus spectrofluorometer. X-ray single crystal diffraction data were collected on a Nonius Kappa CCD diffractometer, using Mo K $\alpha$  radiation ( $\lambda$ ) 0.71073 Å (graphite monochromator).

### Synthesis of 2,5-bis(4-pyridyl)thiazolo[5,4-d]thiazole (Py<sub>2</sub>TTz).

Py<sub>2</sub>TTz was synthesized according to the previous reported procedure, and the data of <sup>1</sup>H NMR spectrum was matched the literature<sup>S1</sup>. <sup>1</sup>H NMR (400 MHz, CDCl<sub>3</sub>):  $\delta$  (ppm) = 8.78 (d,  $J$  = 6.0 Hz, 4H; H<sub>2</sub>), 7.88 (d,  $J$  = 6.0 Hz, 4H; H<sub>1</sub>).

### Synthesis of diaryliodonium triflate

Diaryliodonium triflate was synthesized according to the previous reported procedure from Olofsson group<sup>S2</sup>.

### General synthetic procedure for compounds 1-3.

**Py<sub>2</sub>TTz** (90.0 mg, 0.3 mmol), copper(II) acetate (6.0 mg, 0.03 mmol) and diaryliodonium triflate (1.2 mmol) were heated to 100 °C in 10 mL of DMF for 36 h under nitrogen condition. The reaction solution was then cooled to RT and poured into 50 mL of CH<sub>2</sub>Cl<sub>2</sub>. The product was isolated by centrifugation, followed with washed several times with CH<sub>2</sub>Cl<sub>2</sub> and ether.

***N,N'*-diphenyl 2,5-bis(4-pyridinium)thiazolo[5,4-d]thiazole ditriflate (1).** Yellow solid, yield: 89%. <sup>1</sup>H NMR (400 MHz, DMSO-*d*<sub>6</sub>):  $\delta$  (ppm) = 9.52 (d, *J* = 6.0 Hz, 4H; H<sub>5</sub>), 8.90 (d, *J* = 6.0 Hz, 4H; H<sub>4</sub>), 7.95 (s, 4H; H<sub>3</sub>), 7.79 (s, 6H; H<sub>1+2</sub>). <sup>13</sup>C NMR (100 MHz, DMSO-*d*<sub>6</sub>):  $\delta$  (ppm) = 165.54, 156.24, 146.98, 146.37, 142.78, 131.92, 130.71, 125.06, 124.49, 122.68, 119.48. ESI-HRMS (*m/z*): calcd for [C<sub>26</sub>H<sub>18</sub>N<sub>4</sub>S<sub>2</sub>]<sup>2+</sup>, 225.0481; found, 225.0486.

***N,N'*-di(1-(4-bromophenyl)) 2,5-bis(4-pyridinium)thiazolo[5,4-d]thiazole ditriflate (2).** Yellow solid, yield: 85%. <sup>1</sup>H NMR (400 MHz, DMSO-*d*<sub>6</sub>):  $\delta$  (ppm) = 9.50 (d, *J* = 6.0 Hz, 4H; H<sub>4</sub>), 8.92 (d, *J* = 6.4 Hz, 4H; H<sub>3</sub>), 8.04 (d, *J* = 8.8 Hz, 4H; H<sub>2</sub>), 7.93 (d, *J* = 8.8 Hz, 4H; H<sub>1</sub>). <sup>13</sup>C NMR (100 MHz, DMSO-*d*<sub>6</sub>):  $\delta$  (ppm) = 165.57, 156.39, 147.18, 146.43, 141.93, 133.58, 127.35, 125.49, 124.50, 122.72, 119.52. ESI-HRMS (*m/z*): calcd for [C<sub>26</sub>H<sub>16</sub>Br<sub>2</sub>N<sub>4</sub>S<sub>2</sub>]<sup>2+</sup>, 303.9576; found, 303.9587.

***N,N'*-di(1-(4-methoxyphenyl)) 2,5-bis(4-pyridinium)thiazolo[5,4-d]thiazole ditriflate (3).** Yellow solid, yield: 85%. <sup>1</sup>H NMR (400 MHz, DMSO-*d*<sub>6</sub>):  $\delta$  (ppm) = 9.46 (d, *J* = 7.2 Hz, 4H; H<sub>5</sub>), 8.86 (d, *J* = 7.2 Hz, 4H; H<sub>4</sub>), 7.91 (d, *J* = 9.2 Hz, 4H; H<sub>3</sub>), 7.33 (d, *J* = 9.2 Hz, 4H; H<sub>2</sub>), 3.91 (s, 6H; H<sub>1</sub>). <sup>13</sup>C NMR (100 MHz, DMSO-*d*<sub>6</sub>):  $\delta$  (ppm) = 165.57, 161.86, 156.16, 146.40, 146.10, 135.86, 126.46, 124.45, 122.73, 119.52, 115.77, 56.47. ESI-HRMS (*m/z*): calcd for [C<sub>28</sub>H<sub>22</sub>N<sub>4</sub>O<sub>2</sub>S<sub>2</sub>]<sup>2+</sup>, 255.0587; found, 255.0588. **Crystal Data** for C<sub>15</sub>H<sub>11</sub>F<sub>3</sub>N<sub>2</sub>O<sub>4</sub>S<sub>2</sub> (*M* = 404.38 g/mol): monoclinic, space group C2/c, *a* = 16.4424(12) Å, *b* = 10.2099(8) Å, *c* = 20.8080(15) Å,  $\beta$  = 110.745(2), *V* = 3266.7(4) Å<sup>3</sup>, *Z* = 8, *T* = 153.0 K,  $\mu$ (CuK $\alpha$ ) = 3.515 mm<sup>-1</sup>, *D*<sub>calc</sub> = 1.644 g/cm<sup>3</sup>, 24564 reflections measured (9.088° ≤ 2 $\theta$  ≤ 136.608°), 2978 unique (*R*<sub>int</sub> = 0.0473, *R*<sub>sigma</sub> = 0.0271) which were used in all calculations. The final *R*<sub>1</sub> was 0.0276 (*I* > 2 $\sigma$ (*I*)) and *wR*<sub>2</sub> was 0.0781 (all data).

**Synthesis of *N,N'*-dibenzyl 2,5-bis(4-pyridinium)thiazolo[5,4-d]thiazole dibromide (4).**

The compound was synthesized by using a procedure modified from a literature<sup>1</sup>. **Py<sub>2</sub>TTz** (296 mg, 1.0 mmol) and benzyl bromide (1.37 g, 8.0 mmol) were heated to 90 °C for 2 days in 30 mL dry DMF under nitrogen condition. The product was isolated by centrifugation, following washed several times with CH<sub>2</sub>Cl<sub>2</sub> to afford bright yellow solid (Yield: 63%). <sup>1</sup>H NMR (600 MHz, DMSO-*d*<sub>6</sub>): δ (ppm) = 9.36 (d, *J* = 7.2 Hz, 4H; H<sub>5</sub>), 8.79 (d, *J* = 7.2 Hz, 4H; H<sub>6</sub>), 7.59 (d, *J* = 7.2 Hz, 4H; H<sub>3</sub>), 7.49-7.45 (m, 6H; H<sub>1+2</sub>), 5.92 (s, 4H; H<sub>4</sub>).

### Optimization of experimental conditions for synthesis of **P1**.

We have optimized synthetic conditions of **P1** by screening stoichiometric ratios, various solvent mixtures and reaction time, meanwhile keeping other experimental conditions the same. We found that the polymerization in a mixture of Et<sub>3</sub>N/toluene (1:1.5, v/v) solvent is optimal to afford resilient mesoporous fibrous **P1** (see Figure S13).

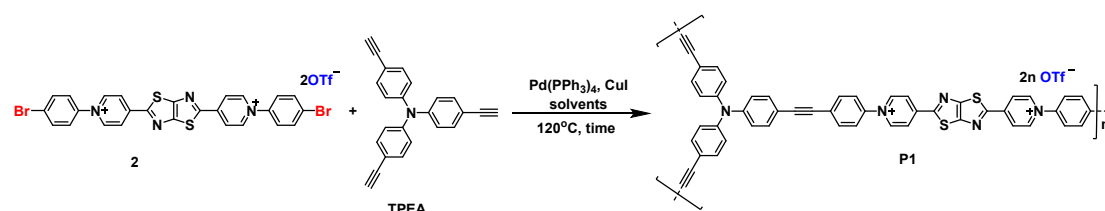

| Stoichiometric ratio | Solvents (mL)                       | Time (h) | Stirring bar | Morphology |
|----------------------|-------------------------------------|----------|--------------|------------|
| 1.5:1                | Toluene/Et <sub>3</sub> N = 1.5 / 1 | 48       | Without      | Fig. S13a  |
| 1.5:1                | DMF/Et <sub>3</sub> N = 1.5 / 1     | 48       | Without      | Fig. S13b  |
| 1.5:0.8              | Toluene/Et <sub>3</sub> N = 1.5 / 1 | 48       | Without      | Fig. S13c  |
| 1:0.8 (optimal)      | Toluene/Et <sub>3</sub> N = 1.5 / 1 | 48       | Without      | Fig. S13d  |
| 1:0.8                | Toluene/Et <sub>3</sub> N = 1.5 / 1 | 48       | With         | Fig. S13e  |
| 1:0.8                | Toluene/Et <sub>3</sub> N = 1.5 / 1 | 72       | Without      | Fig. S13f  |

### Synthesis of **P1** (optimal condition).

Under nitrogen condition, compound **3** (17.6 mg, 0.02 mmol), tris(4-ethynylphenyl)amine (8.0 mg, 0.025 mmol), Pd(PPh<sub>3</sub>)<sub>4</sub> (1.5 mg, 5%) and CuI (0.5 mg, 10%) were heated to 120 °C for 48 h in a solvent mixture of Et<sub>3</sub>N/toluene (2.5 mL, 1:1.5, v/v) without stirring. After cooling to room temperature, the precipitate was collected by centrifugation and washed with CH<sub>3</sub>OH, CH<sub>2</sub>Cl<sub>2</sub> and ether, respectively, for several times. A dark brown powder was obtained after vacuum oven drying (Yield: 58%).

### Synthesis of **P2-Br**.

**Py<sub>2</sub>TTz** (296 mg, 1.0 mmol) and  $\alpha,\alpha'$ -dibromo-p-xylene (264 mg, 1.0 mmol) were heated to 90 °C for 3 days in 30 mL dry DMF under nitrogen condition. The product was isolated by centrifugation, which washed several times with CH<sub>2</sub>Cl<sub>2</sub> to afford dark yellow solid (Yield: 99%).

#### **Synthesis of P2.**

**P2** (1.0 mmol) and methyl trifluoromethanesulfonate (10 mol) were stirred at RT overnight in 30 mL dry CH<sub>3</sub>CN under nitrogen condition. After removing the solvent by evaporation, the product was washed several times with CH<sub>2</sub>Cl<sub>2</sub> to afford orange yellow solid (Yield: 99%).

#### **Cyclic Voltammetry of 1-4.**

Cyclic voltammetry (CV) curves were performed on a CHI760E instrument. CV experiments of the small molecules were conducted on a 0.5 mM solution in degassed DMF containing 0.05 M TBAPF<sub>6</sub> as supporting electrolyte. A typical three-electrode cell was used having a polished glassy carbon (with 4 mm diameter) electrode as the working electrode, a Pt-wire as the counter electrode, and Ag/AgCl as the reference electrode, potential E referenced to Fc<sup>+</sup>/Fc.

#### **Spectroelectrochemical Methods.**

The solution for spectroelectrochemical experiment were prepared in CH<sub>3</sub>CN without degassing and other conditions were the same as above. A customized three-electrode electrolytic cell was used with a Pt-mesh electrode as the working electrode, a Pt-wire as the counter electrode, and Ag/AgCl electrode as the reference electrode. The voltage range and the time were controlled by the program of the electrochemical workstation, and the absorption spectra were recorded by UV-vis spectrophotometer.

#### **Battery Fabrication and Testing.**

The working electrode materials were prepared by mixing the active material, carbon black (ECP-600JD) and polyvinylidene fluoride in a mass ratio of 60/30/10 using *N*-methyl pyrrolidone as solvent. The electrodes were then prepared by casting the resulting inks onto carbon-coated copper foil. The fully prepared electrodes were dried at 50 °C for 6 h, and then kept at 80 °C overnight in a vacuum oven in order to remove residual solvent. The electrodes were cut into disks with a diameter of 12 mm, and the mass loading of active material pasted on the carbon-coated copper foil is about 0.4-0.7 mg cm<sup>-2</sup>. CR2032-type coin cells were assembled in an argon-filled glove box (<0.1 ppm of oxygen and <0.01 ppm of water). Lithium foil was employed as the counter electrode and macroporous polypropylene separator film (Celgard 2400) was

adopted as the separator. 1.0 M LiPF<sub>6</sub> in a mixture of ethylene carbonate (EC), dimethyl carbonate (DMC) and ethyl methyl carbonate (EMC) (1:1:1, v/v/v) with 1% vinylene carbonate (VC) was used as the electrolyte. The batteries were stood for 12 h before testing.

The battery performance was collected on the LAND CT2001A battery system at various current densities within the voltage window of 0.005-3.0V at room temperature. The cyclic voltammetry measurements of batteries were performed on the CHI760 electrochemical workstation. The electrochemical impedance spectroscopy (EIS) was tested at a frequency range of 100 kHz to 0.1 Hz.

### **Theoretical specific capacity calculation.**

The theoretical specific capacity of the electrode materials is calculated according to the following formula:

$$Q = \frac{nF}{3.6M_w}$$

Q: theoretical specific capacity (mAh g<sup>-1</sup>), n: the number of transferred electrons from one molecule or one repeating unit, F: Faraday constant (96500 C mol<sup>-1</sup>), and M<sub>w</sub>: molecular weight of one molecule or one repeating unit (g mol<sup>-1</sup>).

In our work, **P1**: M<sub>w</sub>(repeating unit)=2868.81 g mol<sup>-1</sup>, n(repeating unit)=6, and **P2**: M<sub>w</sub>(repeating unit)=698.64 g mol<sup>-1</sup>, n(repeating unit)=2, thus the theoretical specific capacity of **P1** is 56 mAh g<sup>-1</sup> and **P2** is 77 mAh g<sup>-1</sup>.

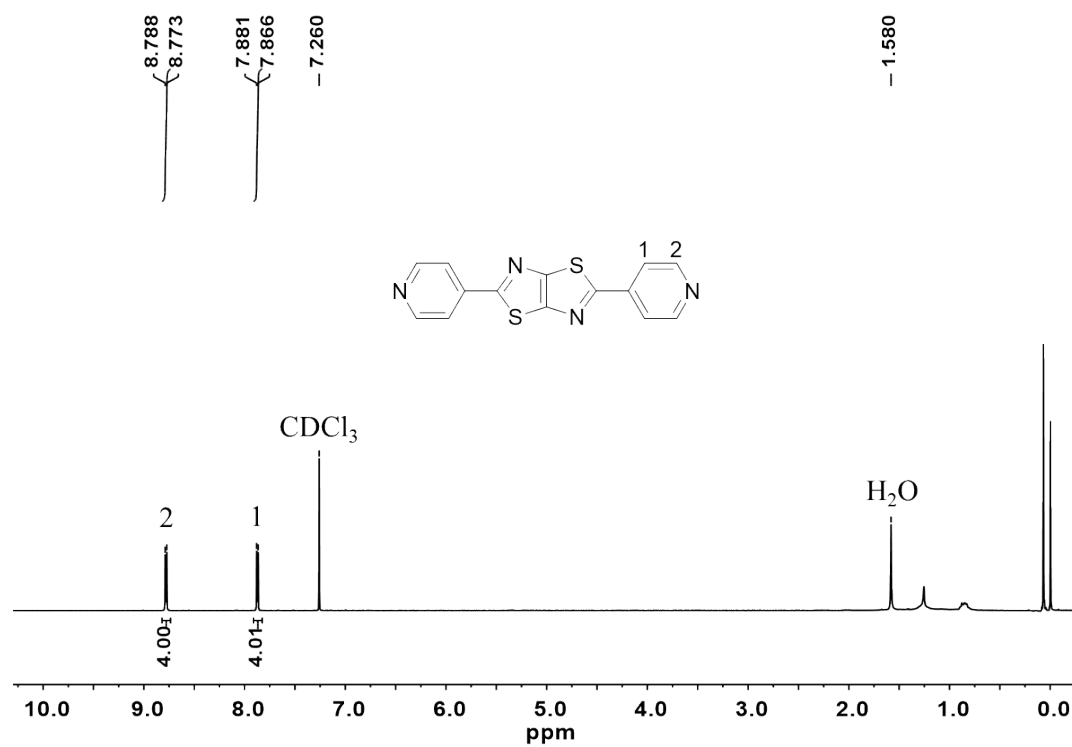

**Figure S1.** <sup>1</sup>H NMR spectrum (400 MHz) of **Py<sub>2</sub>TTz** in CDCl<sub>3</sub>.

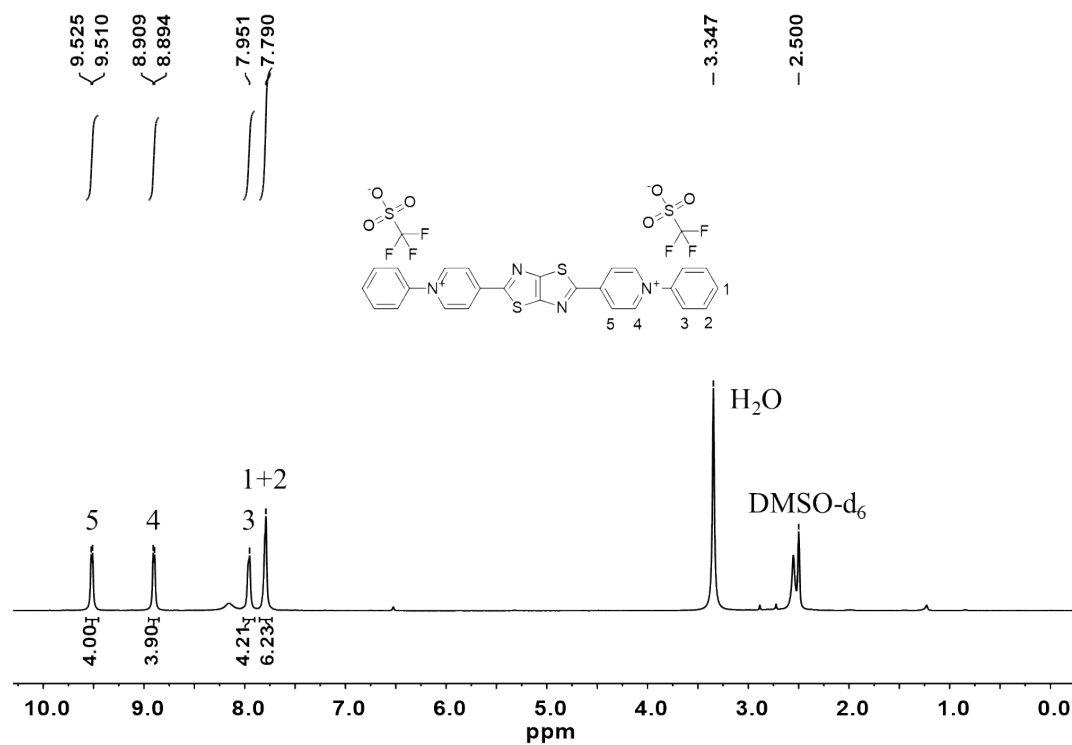

**Figure S2.** <sup>1</sup>H NMR spectrum (400 MHz) of **1** in DMSO-*d*<sub>6</sub>.

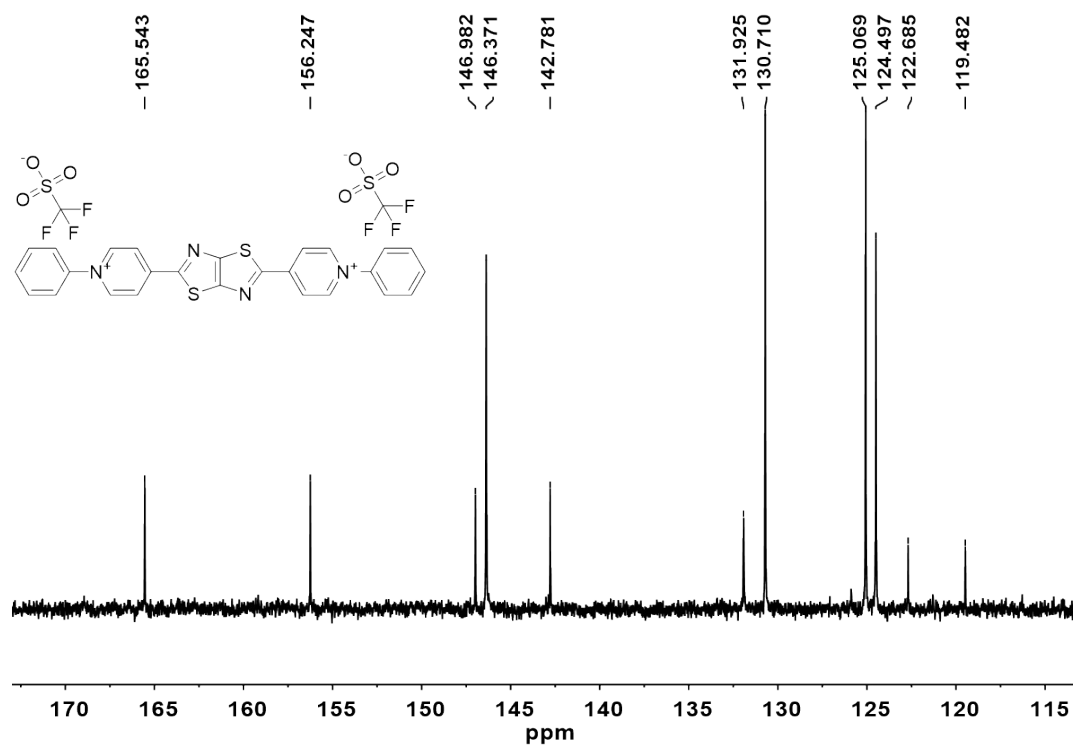

**Figure S3.** <sup>13</sup>C NMR spectrum (100 MHz) of **1** in DMSO-*d*<sub>6</sub>.

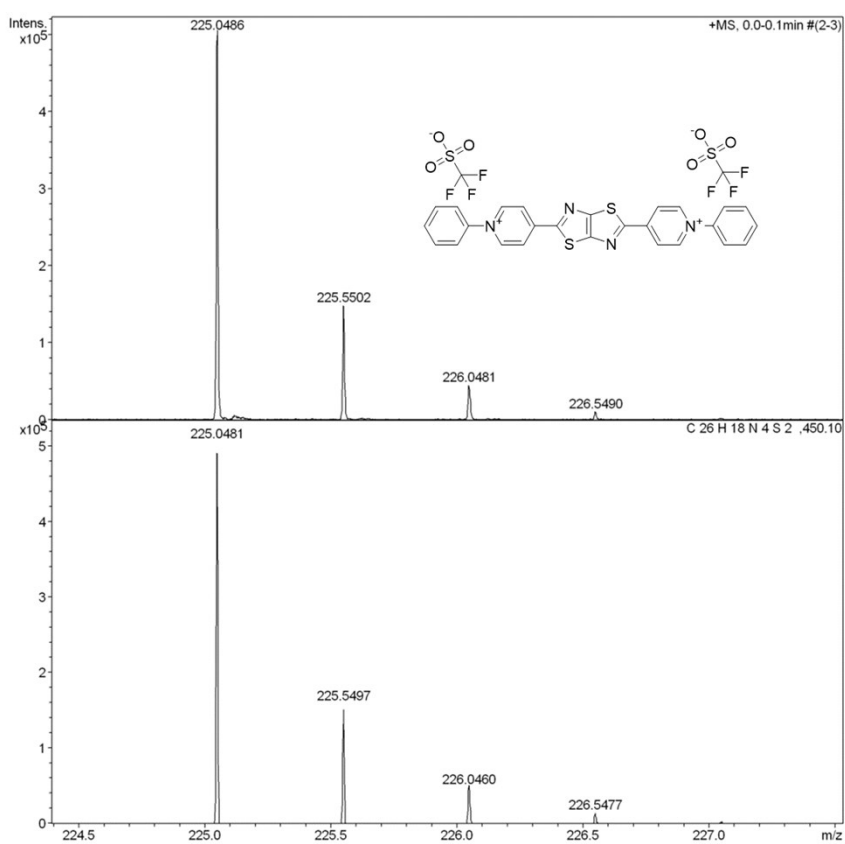

**Figure S4.** ESI-HRMS spectrum of **1**.

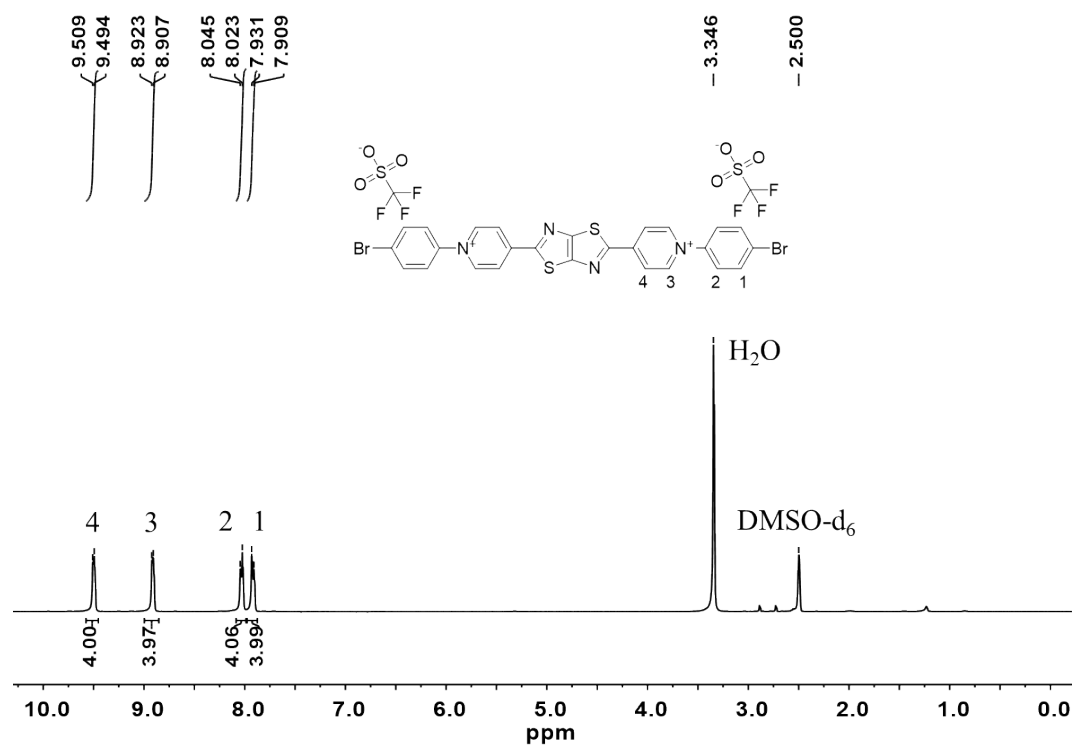

**Figure S5.** <sup>1</sup>H NMR spectrum (400 MHz) of **2** in DMSO-*d*<sub>6</sub>.

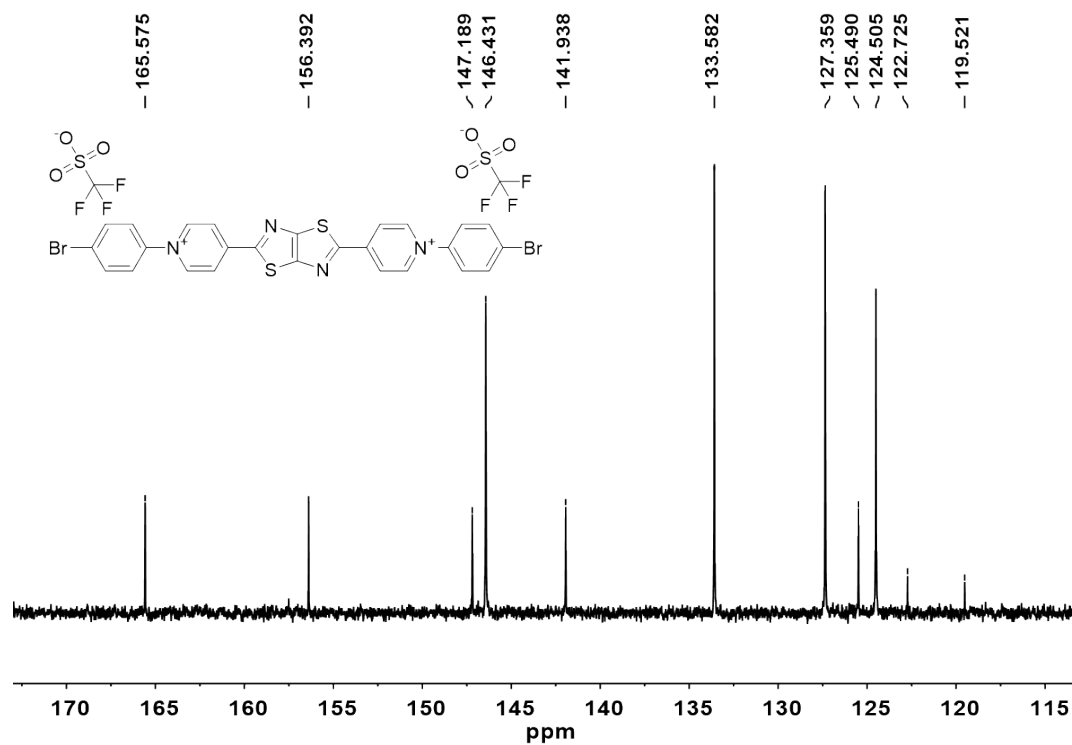

**Figure S6.** <sup>13</sup>C NMR spectrum (100 MHz) of **2** in DMSO-*d*<sub>6</sub>.

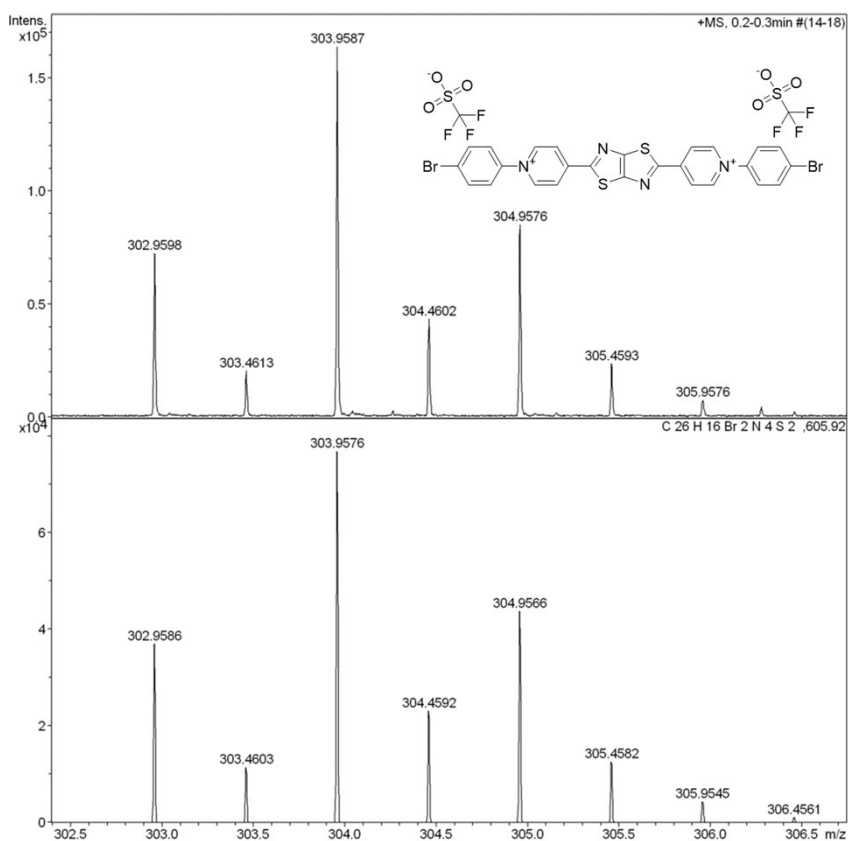

**Figure S7.** ESI-HRMS spectrum of **2**.

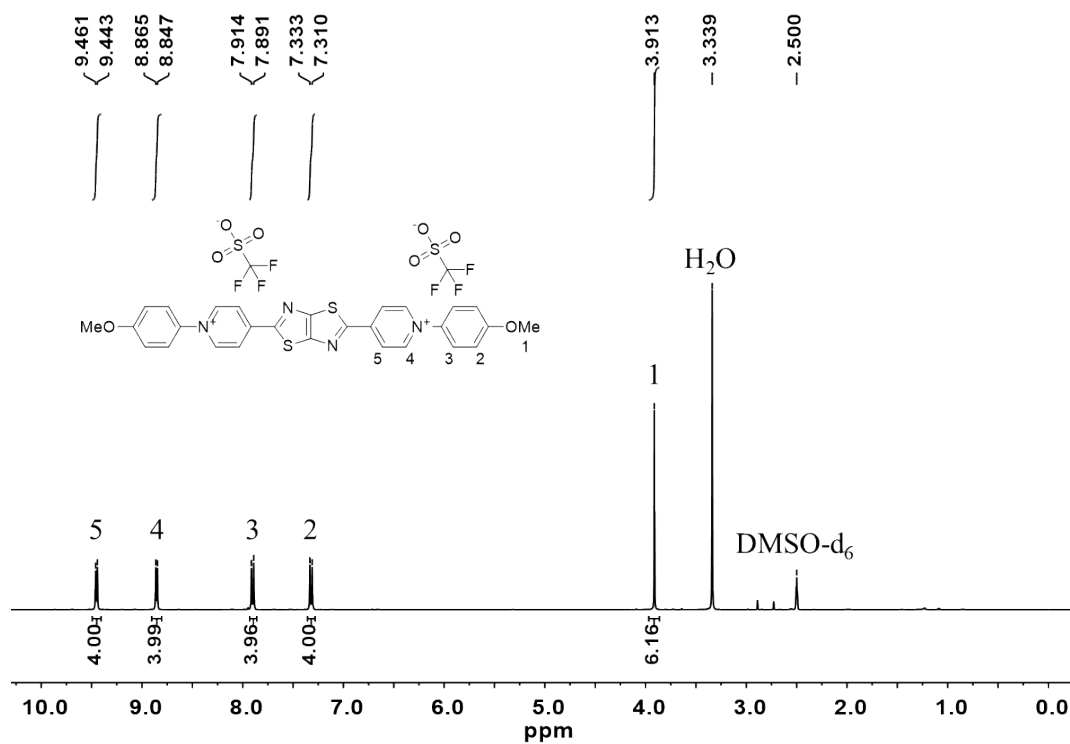

**Figure S8.**  $^1H$  NMR spectrum (400 MHz) of **3** in  $DMSO-d_6$ .

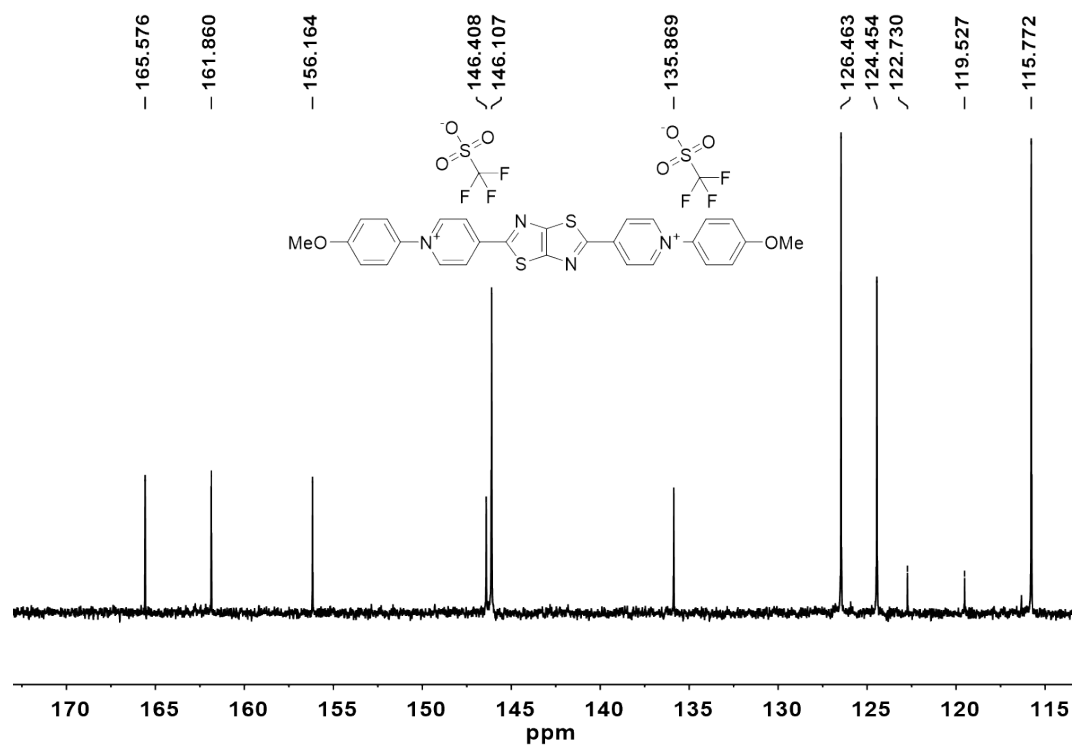

**Figure S9.**  $^{13}\text{C}$  NMR spectrum (100 MHz) of **3** in  $\text{DMSO}-d_6$ .

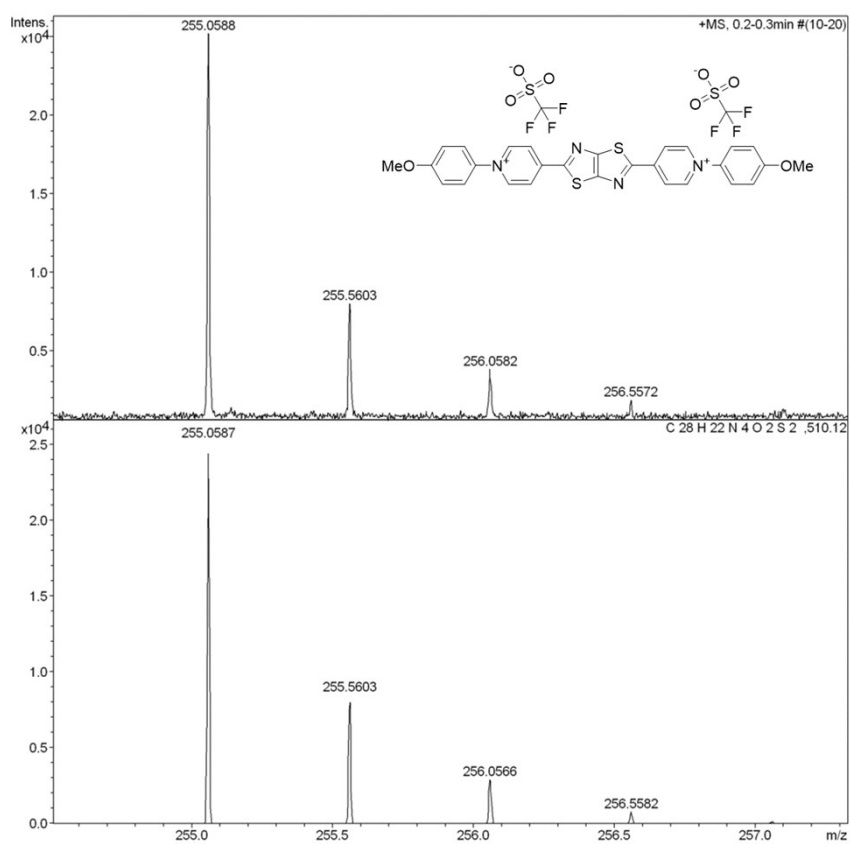

**Figure S10.** ESI-HRMS spectrum of **3**.

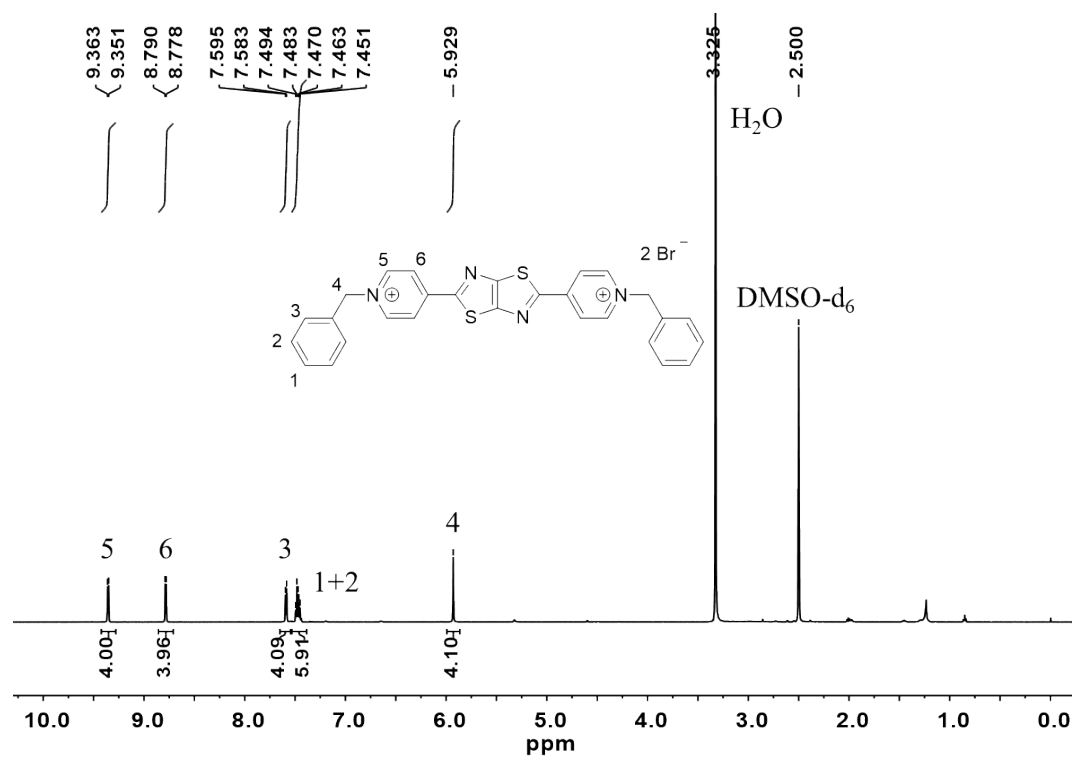

**Figure S11.** <sup>1</sup>H NMR spectrum (600 MHz) of **4** in DMSO-*d*<sub>6</sub>.

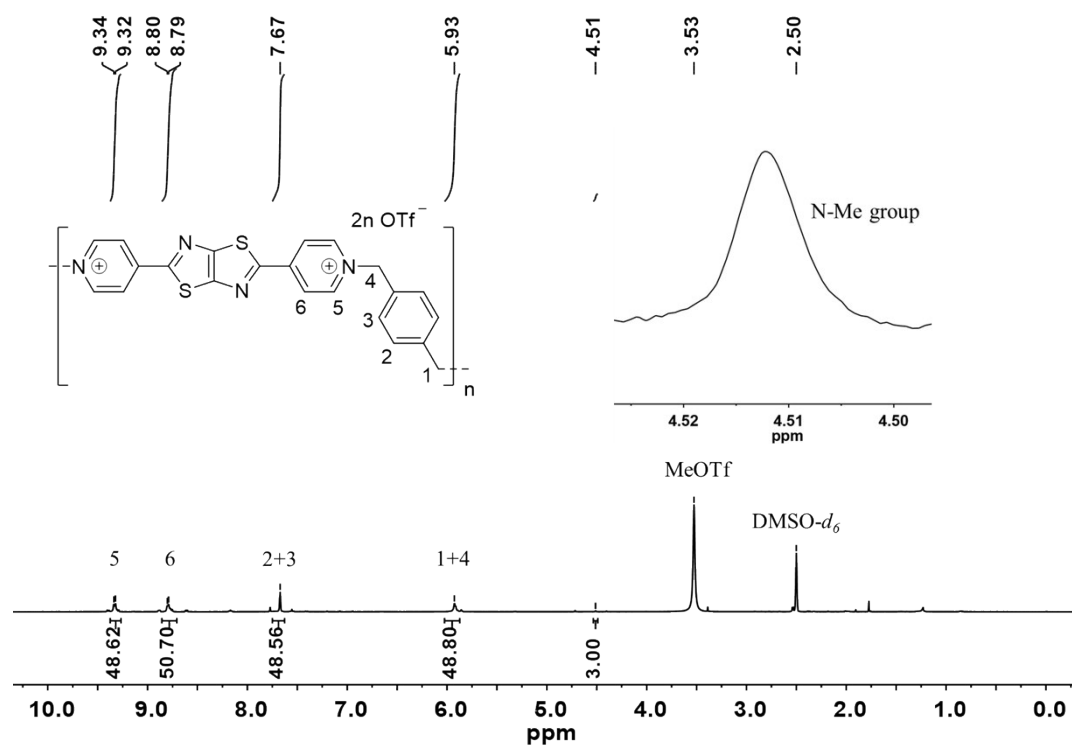

**Figure S12.**  $^1\text{H}$  NMR spectrum (400 MHz) of **P2** in  $\text{DMSO-}d_6$ .

The chemical shift of N-methyl group at the end of **P2** is assigned to 4.51 ppm, and its hydrogen number is scaled to 3. In each repeating unit, the number of H atoms on  $\alpha$ -pyridine is about 48. The signal ratio of N-Me group and  $\alpha$ -H on pyridine in  $^1\text{H}$  NMR shows that the degree of polymerization was *ca.* 12. Thus the molecular weight of **P2** is estimated to *ca.* 8400  $\text{g mol}^{-1}$ .

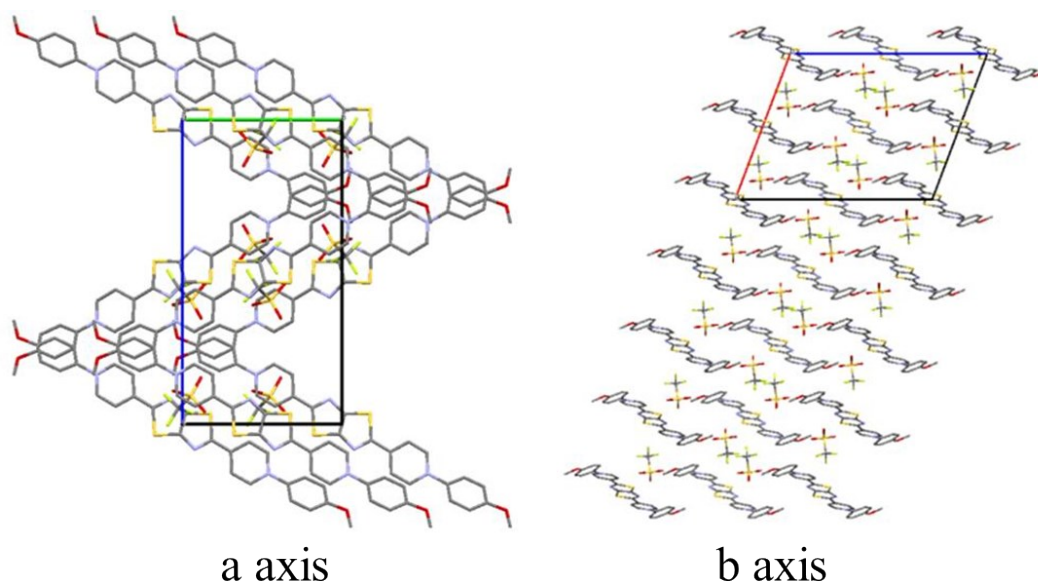

**Figure S13.** Molecular packing in crystals of **3** (CCDC 2071615).

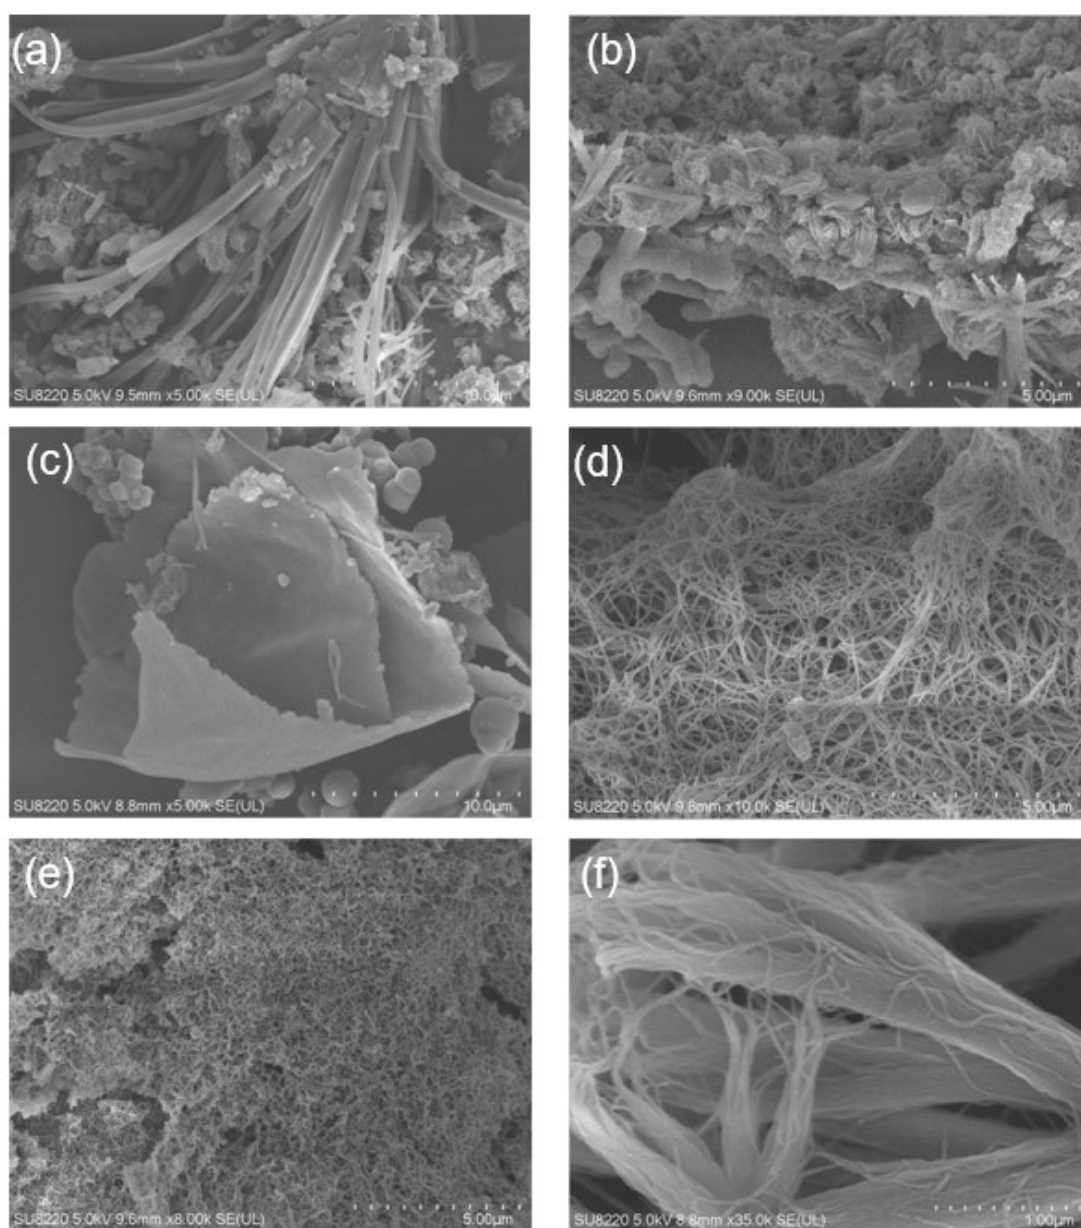

**Figure S14.** SEM images of **P1** obtained from various reaction conditions.

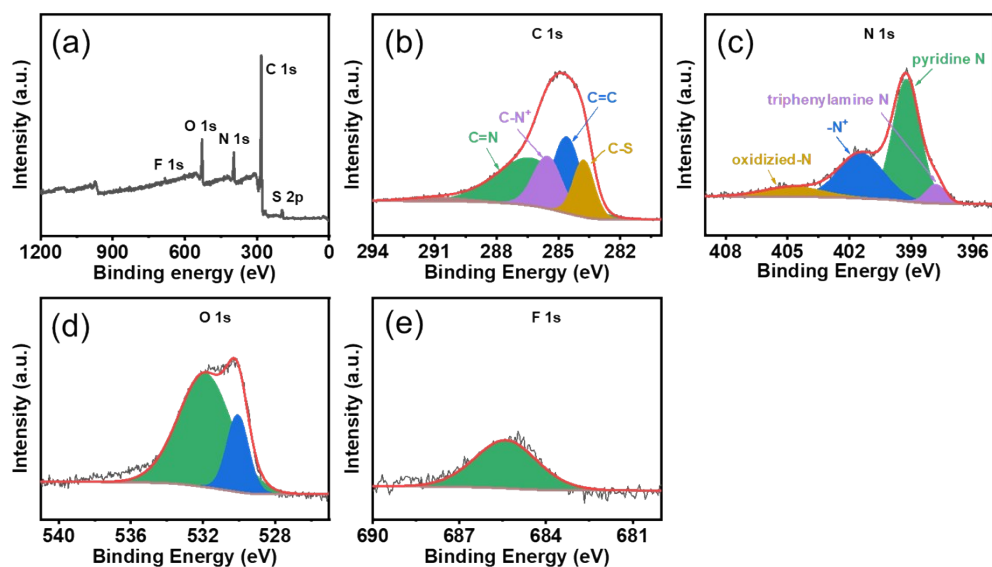

**Figure S15.** (a-e) XPS spectra of **P1**.

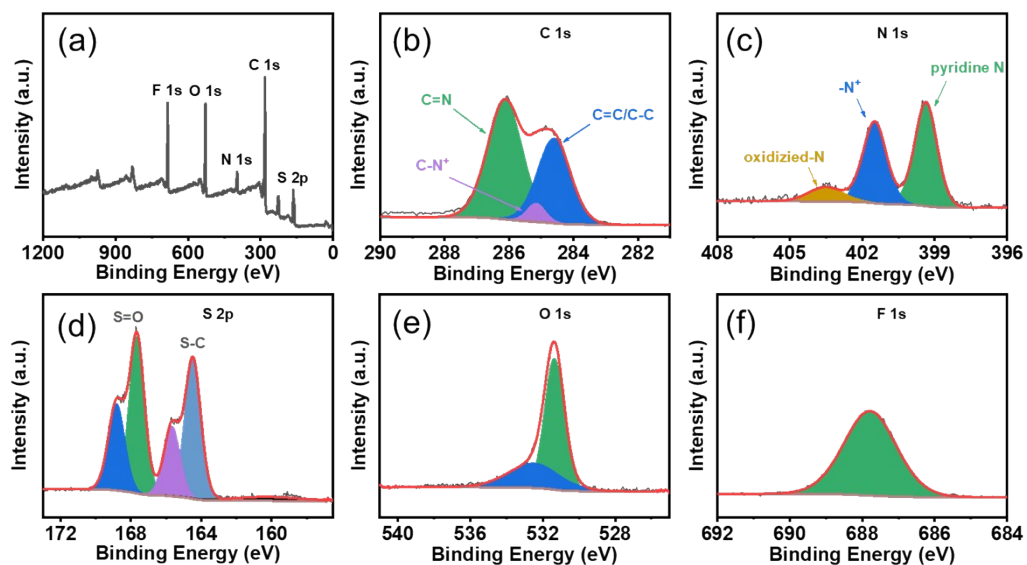

**Figure S16.** (a-f) XPS spectra of **P2**.

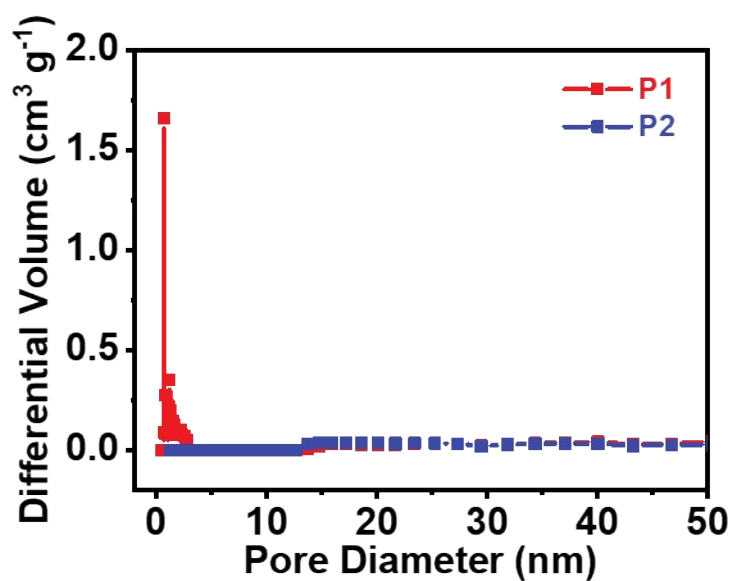

**Figure S17.** The pore-size distributions (0-50 nm) of **P1** and **P2**.

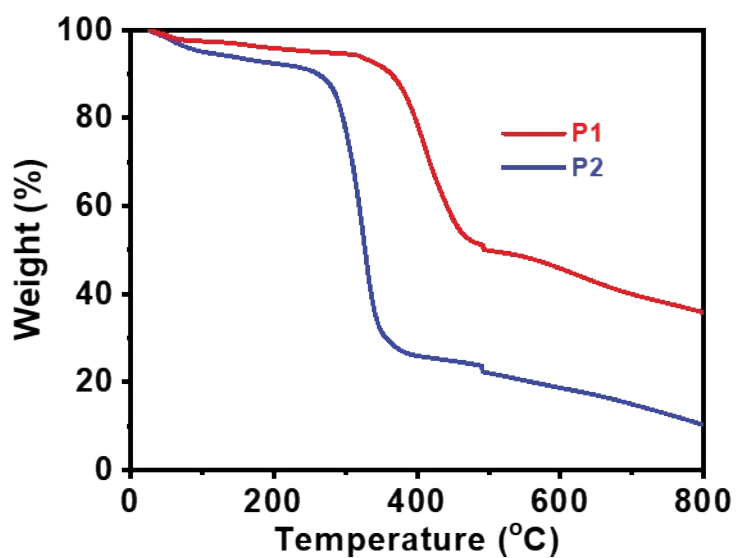

**Figure S18.** TGA profiles of **P1** and **P2** under nitrogen atmosphere.

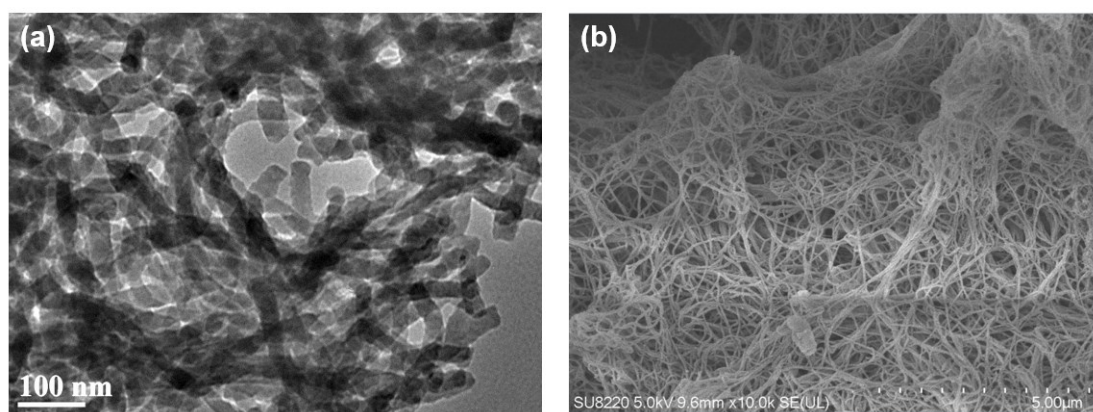

**Figure S19.** (a) TEM and (b) SEM image of **P1**.

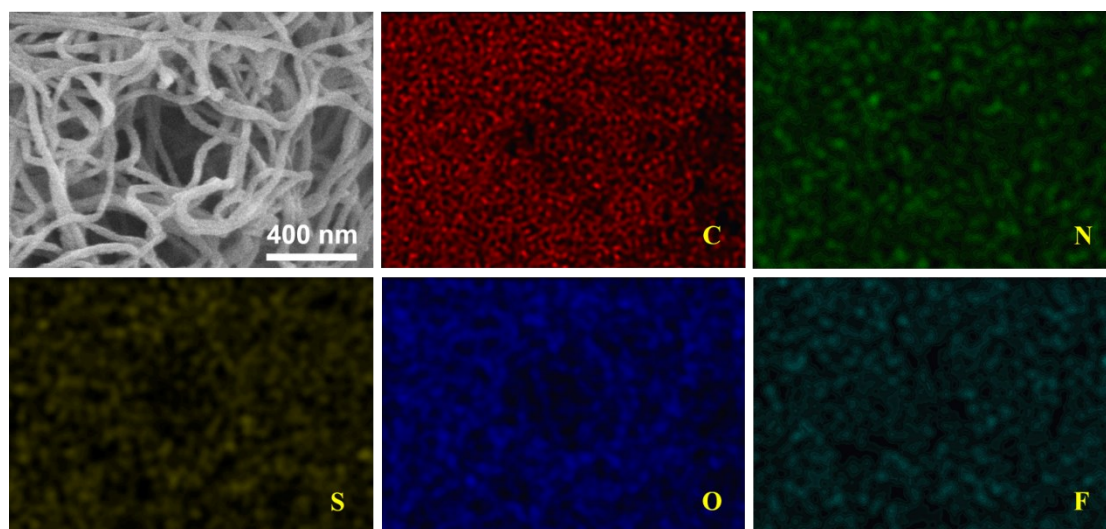

**Figure S20.** SEM element mapping images of **P1**.

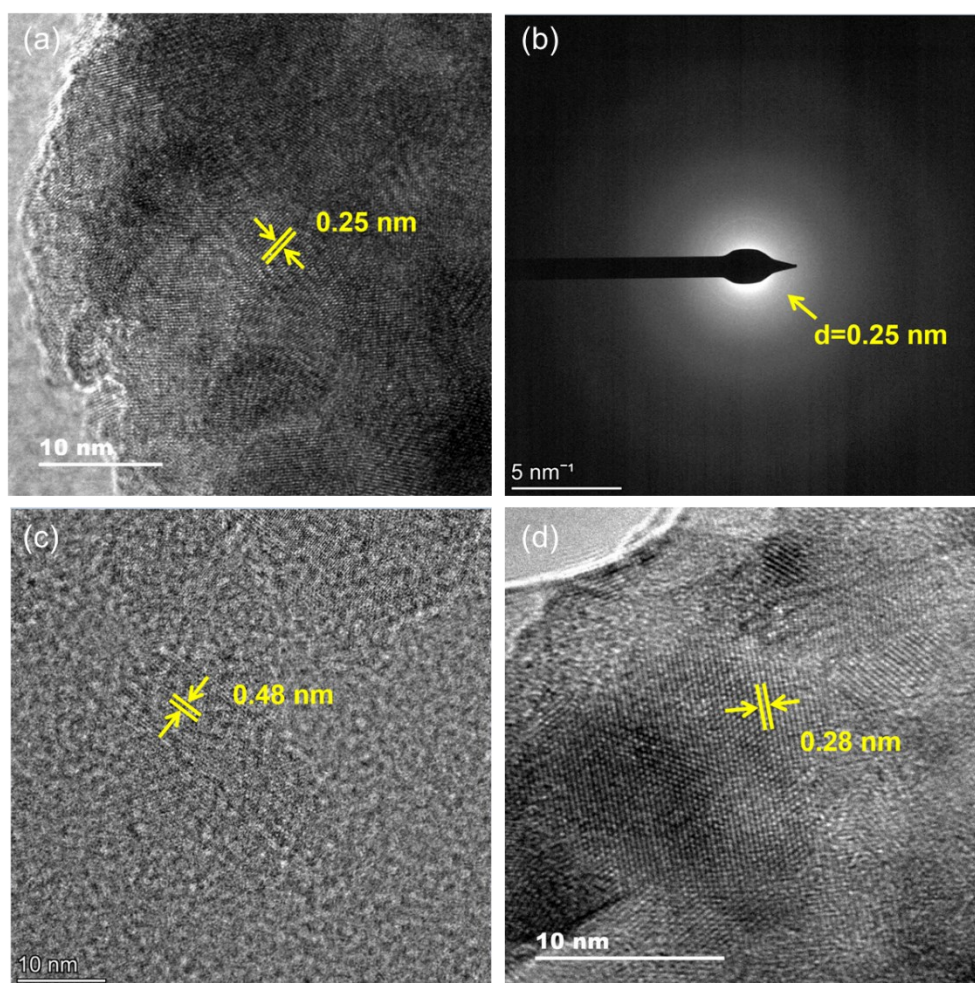

**Figure S21.** (a, c, d) HRTEM and (b) Selected Area Electron Diffraction (SAED) of P1.

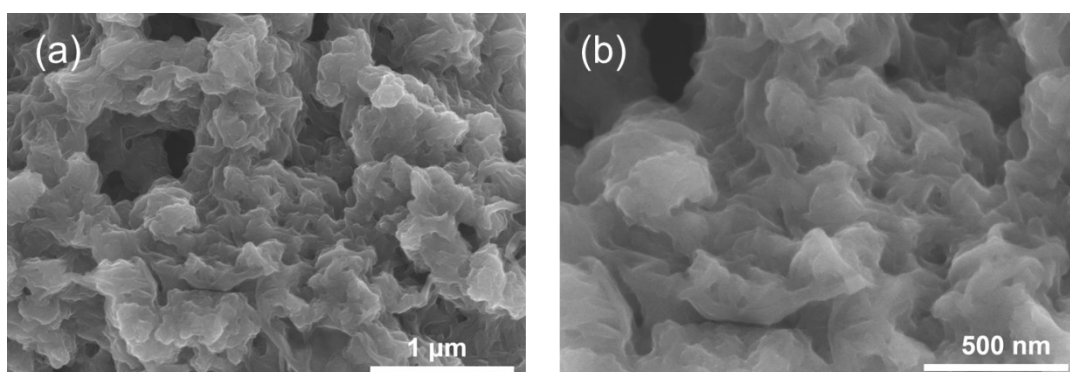

**Figure S22.** (a-b) SEM image of **P2**.

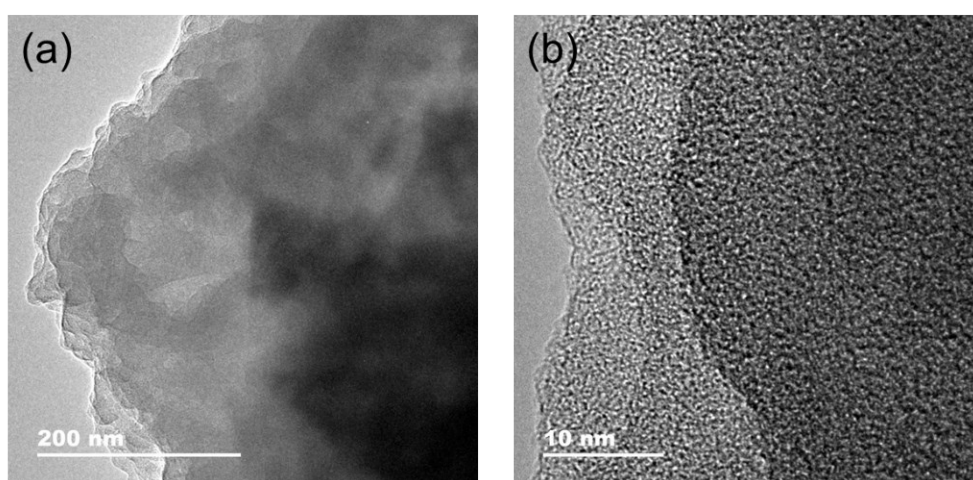

**Figure S23.** TEM image (a) and HRTEM (b) image of **P2**.

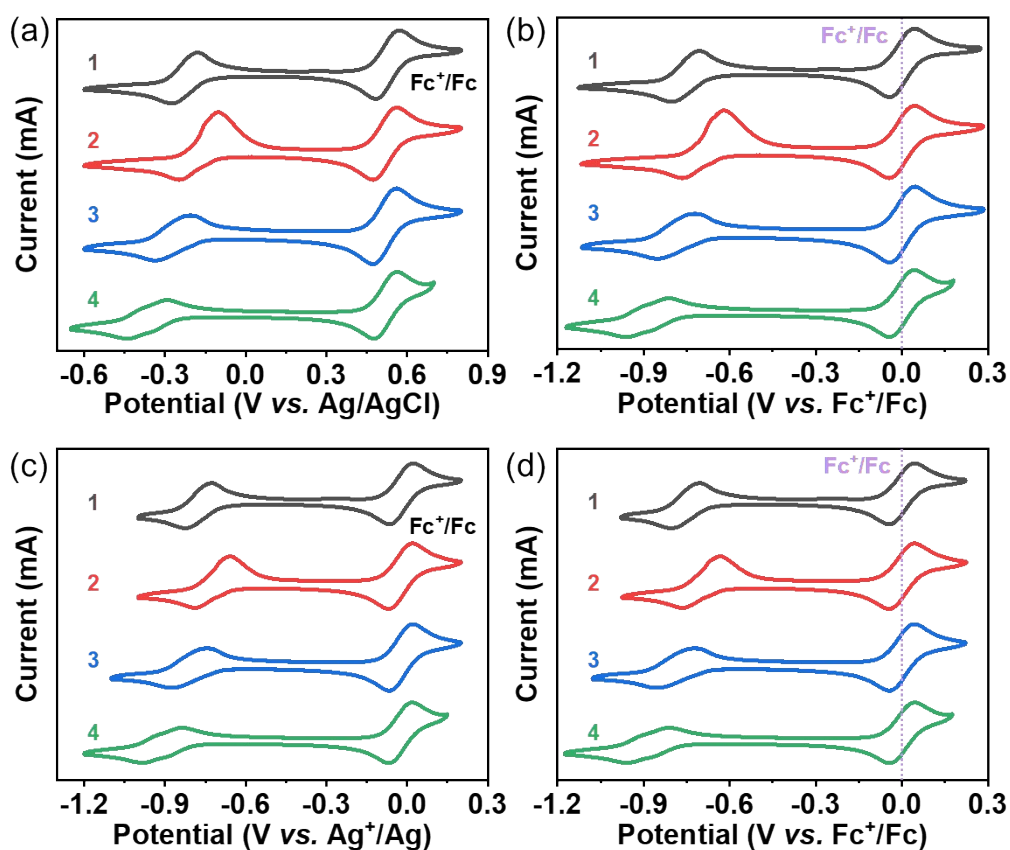

**Figure S24.** Cyclic voltammograms of 1-4 at 100 mV s<sup>-1</sup> in DMF solution with 0.05 M TBAPF<sub>6</sub> as supporting electrolyte by: (a) using Ag/AgCl as quasi-reference electrode and adding ferrocene; (b) using Ag/AgCl as quasi-reference electrode, potential E referenced to Fc<sup>+</sup>/Fc (defined E<sub>1/2</sub>(Fc<sup>+</sup>/Fc)=0); (c) using Ag<sup>+</sup>/Ag as quasi-reference electrode and adding ferrocene; (d) using Ag<sup>+</sup>/Ag as quasi-reference electrode, potential E referenced to Fc<sup>+</sup>/Fc (defined E<sub>1/2</sub>(Fc<sup>+</sup>/Fc)=0).

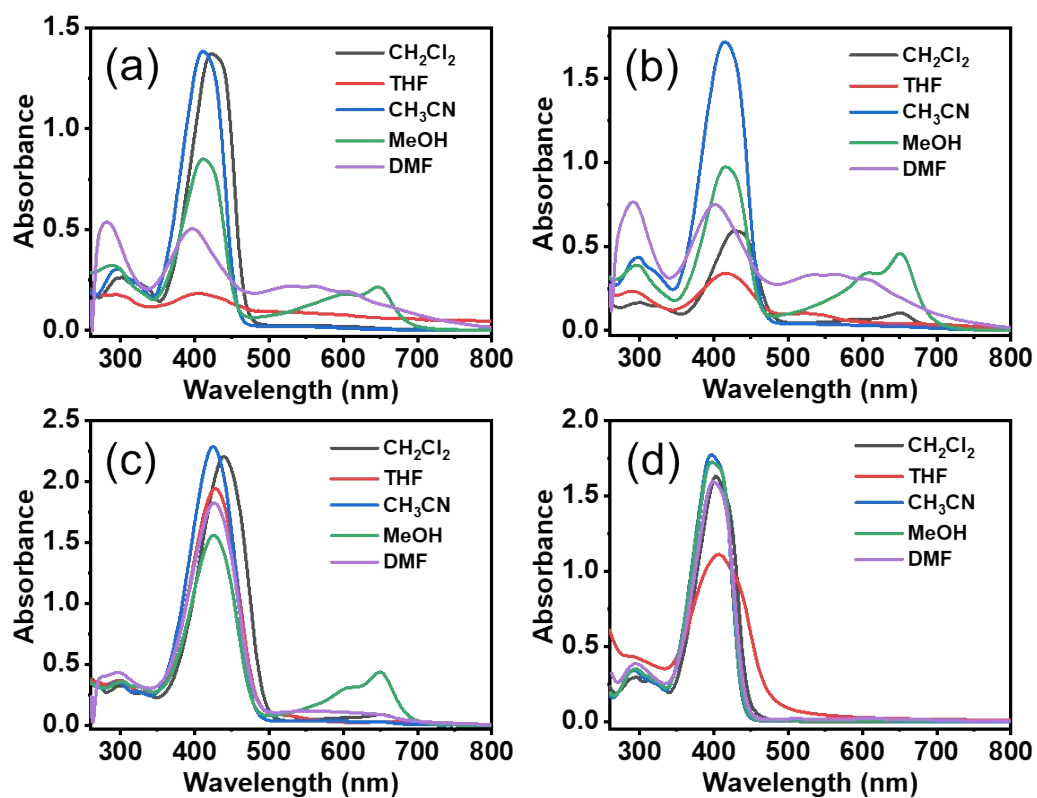

**Figure S25.** UV-vis absorption spectra of **1** (a), **2** (b), **3** (c), **4** (d) in different solvents, respectively.

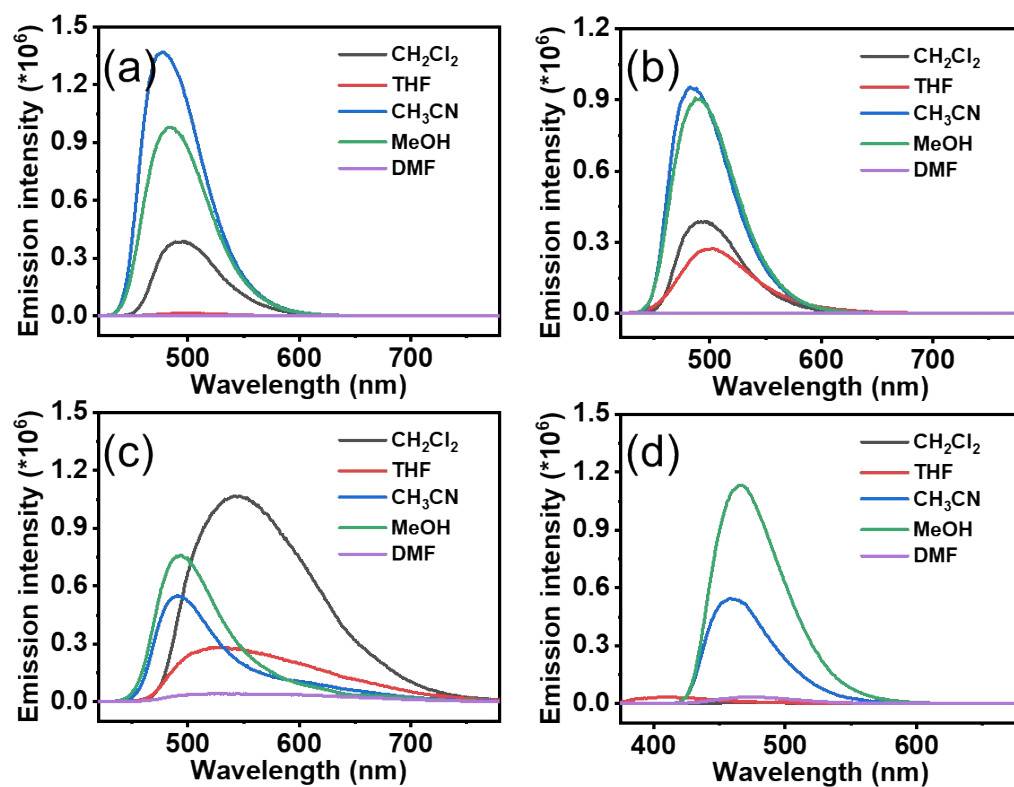

**Figure S26.** Emission spectra of **1** (a), **2** (b), **3** (c), **4** (d) in different solvents, respectively.

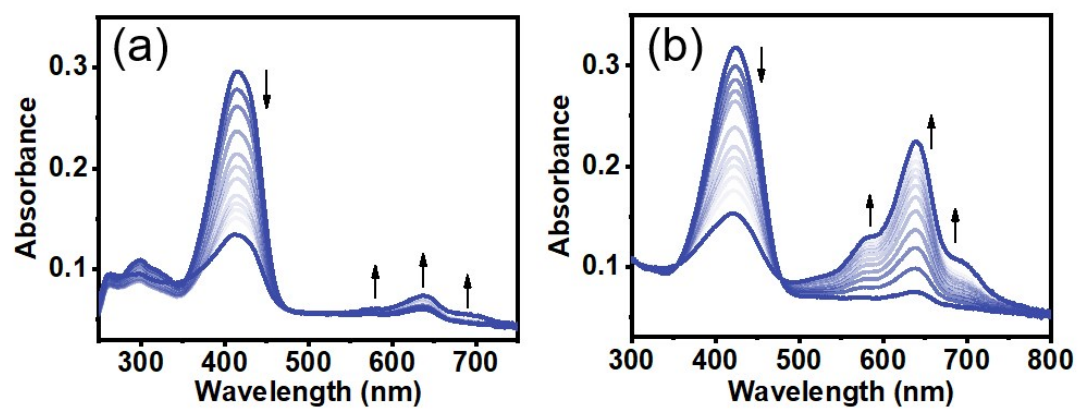

**Figure S27.** Spectroelectrochemistry of **2** (a) and **3** (b) in CH<sub>3</sub>CN vs Ag/AgCl reference, respectively.

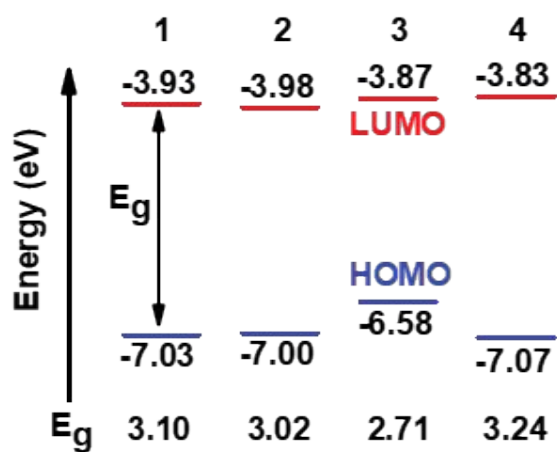

**Figure S28.** The molecular orbital surfaces of the HOMOs and LUMOs of **1-4** obtained at B3LYP/6-31G(d) level in  $\text{CH}_3\text{CN}$ .

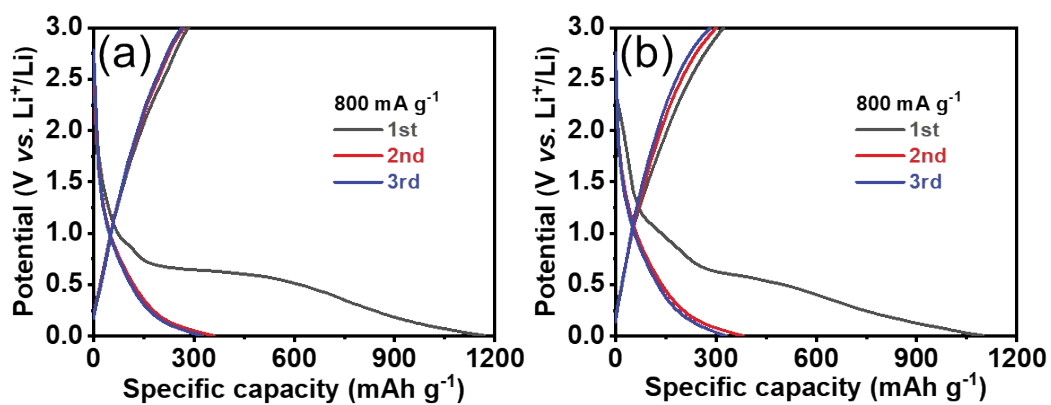

**Figure S29.** The first three charge-discharge profiles of **P1** (a) and **P2** (b) at a current density of  $800 \text{ mA g}^{-1}$ .

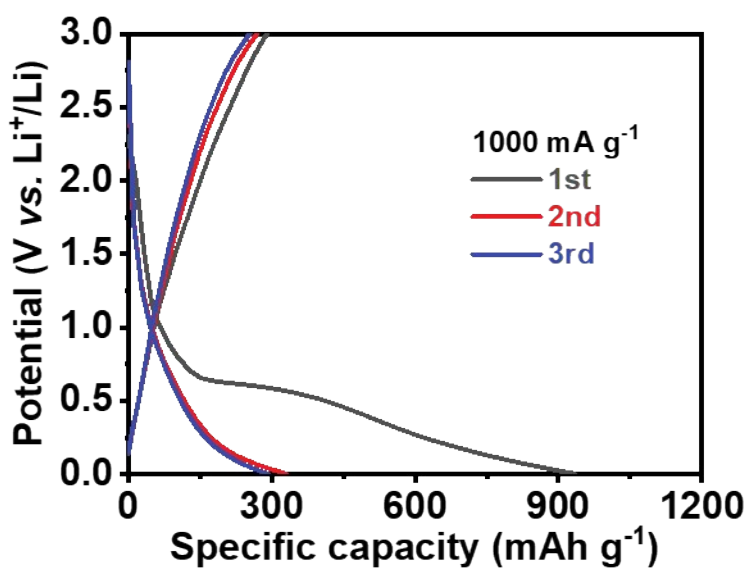

**Figure S30.** The first three charge-discharge profiles of **P1** at a current density of  $1000 \text{ mA g}^{-1}$ .

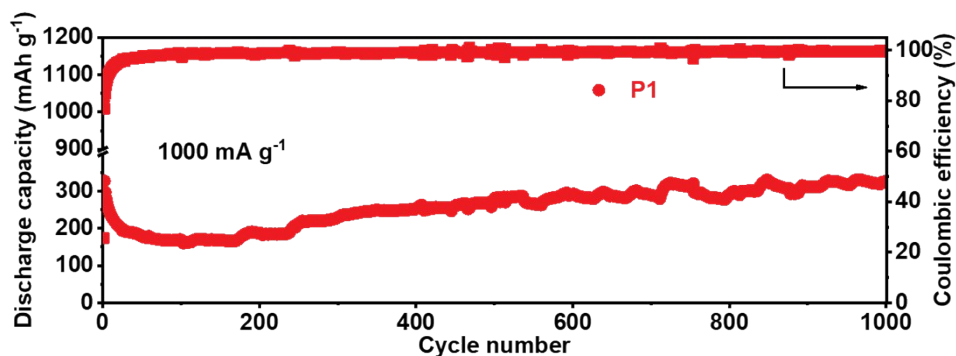

**Figure S31.** Long-term cycling property of **P1** at a current density of 1000 mA g<sup>-1</sup>.

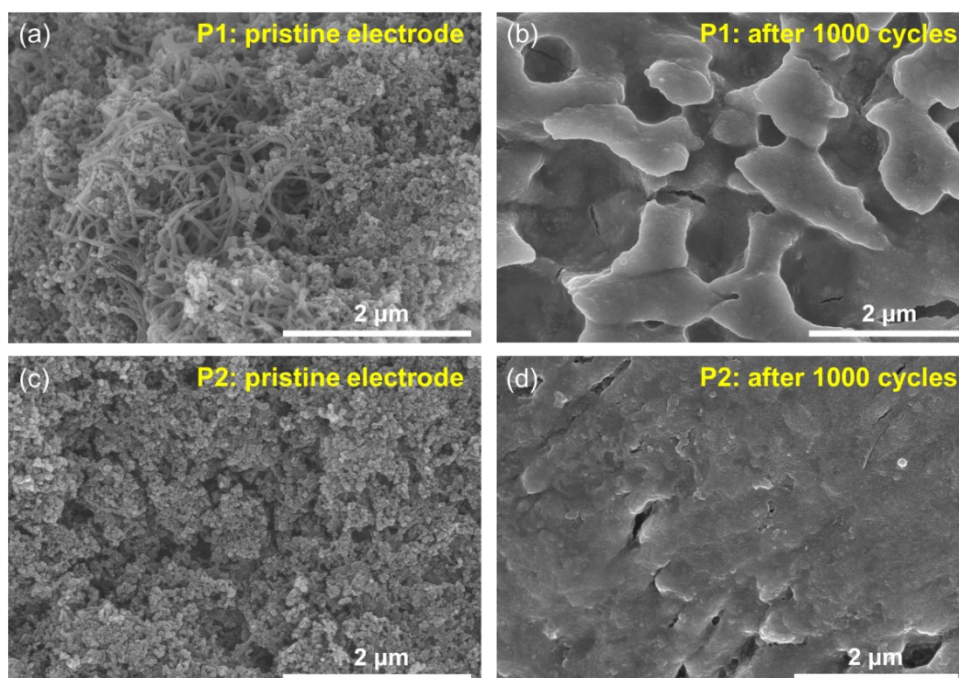

**Figure S32.** The ex-situ SEM images of **P1**: (a) pristine electrode, (b) after 1000 cycles; **P2**: (c) pristine electrode, (d) after 1000 cycles.

In SEM images, the uniform nanofibers mixed with carbon black are clearly observed for fresh **P1** electrode. Compared with the pristine electrode, it was observed that a lamellar film formed on the surface of **P1** electrode after long time of high current density cycling. This is due to the formation of SEI film and a consequence of continuous deposition of the electrolyte decomposed products during 1000 cycles<sup>S3</sup>. But the lamellar structure on the surface of the electrode may enhance the kinetics of **P1**<sup>S4</sup>. Similar changes were also observed for **P2** electrode. It formed a large plate on the surface of the electrode.

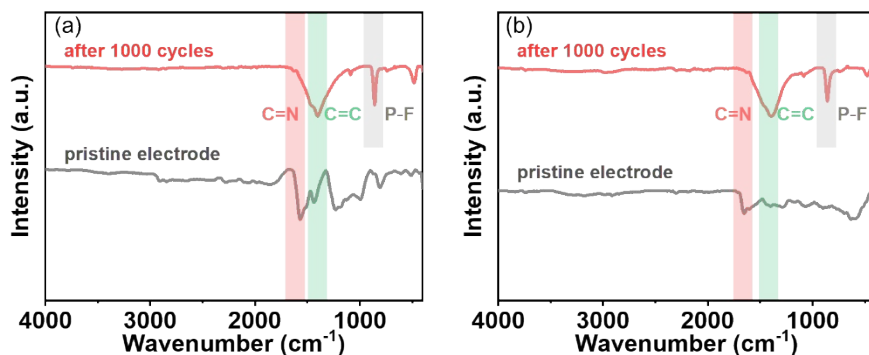

**Figure S33.** The ex-situ FT-IR spectra of (a) **P1** electrode and (b) **P2** electrode.

In FT-IR spectra of **P1** and **P2** pristine electrodes, the peaks at around  $1600\text{ cm}^{-1}$  and  $1400\text{ cm}^{-1}$  can be attributed to C=N bond from pyridine rings and C=C bond from benzene rings, respectively<sup>S5</sup>. After 1000 cycles, both electrodes of **P1** and **P2** exhibit similar profile to that of pristine ones, indicating relatively good reversibility. In addition, the strong peak appears at about  $860\text{ cm}^{-1}$  after cycling, which could be assigned to P-F bond of  $\text{LiPF}_6$ <sup>S6</sup>.

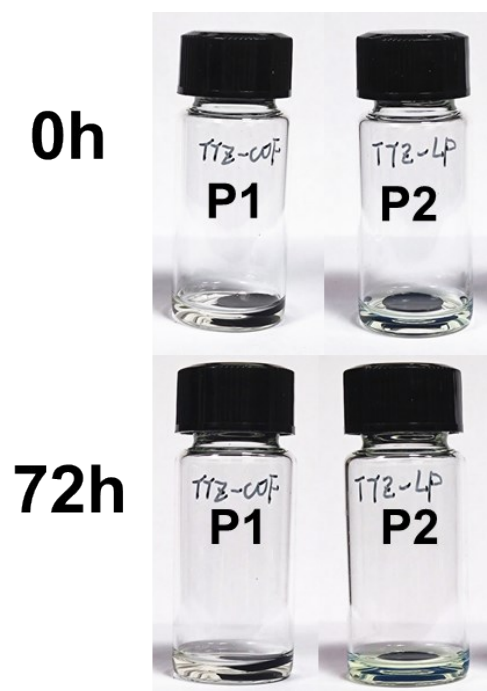

**Figure S34.** Solubility test of **P1** and **P2**.

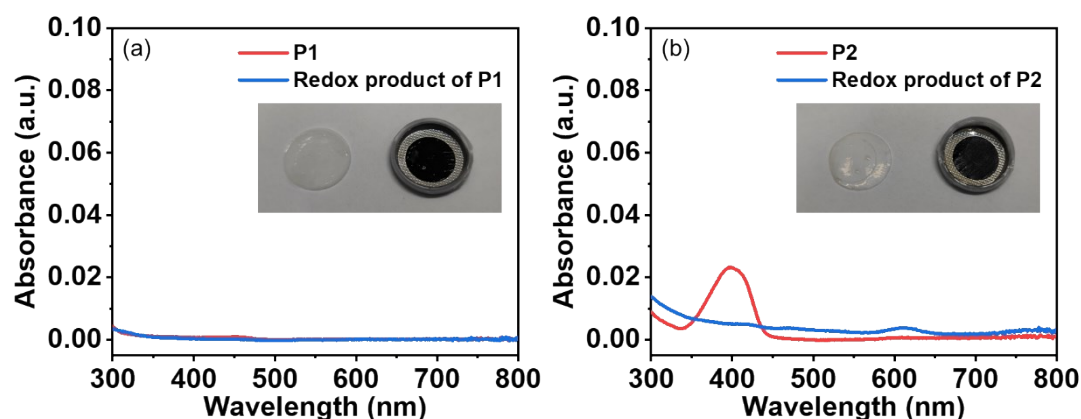

**Figure S35.** (a-b) UV-vis absorption spectra of **P1**, **P2** and their redox products in the electrolyte (EC: DMC: EMC=1:1:1 (v/v/v) with 1% VC) (Inset: Pictures of separator film and electrode of battery discharging to 0.005V).

Solution preparation: (1) Solubility test of **P1** and **P2**: The prepared electrodes with a loading of 0.5-0.8 mg cm<sup>-2</sup> were soaked in 2 mL electrolyte, and the upper-fluid were taken for UV-vis test; (2) Solubility test of redox products of **P1** and **P2**: After discharging the fresh battery to 0.005V, remove the electrode sheet and immerse it in 2 mL electrolyte. The test steps are the same as above. This is consistent with the photos of solubility test in **Fig. S34**.

UV-vis absorption spectroscopy showing extremely low solubility for **P1** and its reductive product in the electrolyte. In contrast, **P2** has a certain solubility in the electrolyte. There is a strong absorption peak at about 400 nm in UV-vis absorption spectra. The reduction product of **P2** can be detected as well, showing a new absorption peak at *ca.* 610 nm. In addition, the separator film of **P1** cell remains clean after discharge, while of **P2** cell has a slight stain. The results were consistent with UV-vis absorption spectra.

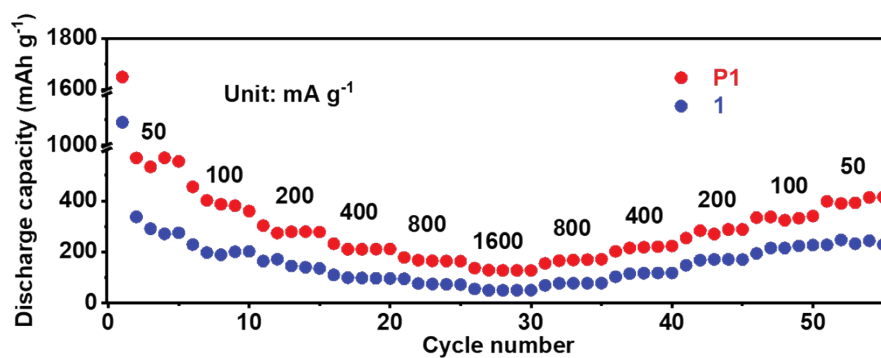

**Figure S36.** Rate performance for **1** and **P1**.

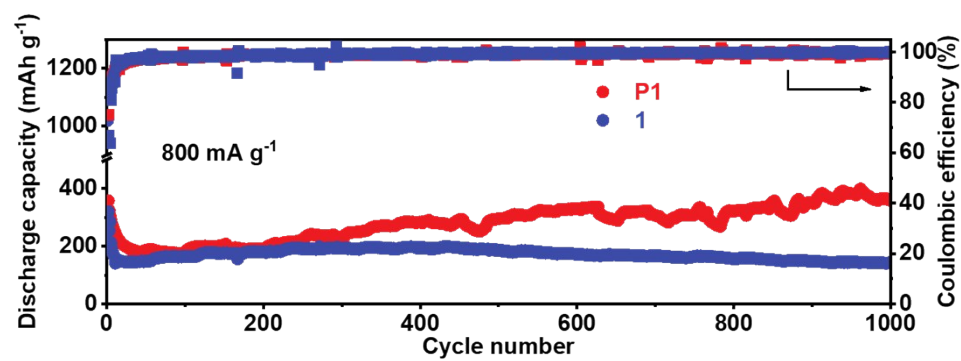

**Figure S37.** Long-term cycling property at 800  $\text{mA g}^{-1}$  for **1** and **P1**.

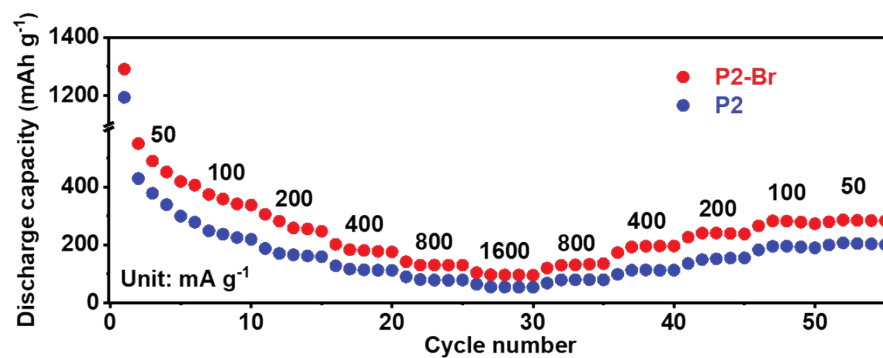

**Figure S38.** Rate performance for **P2** and **P2-Br**.

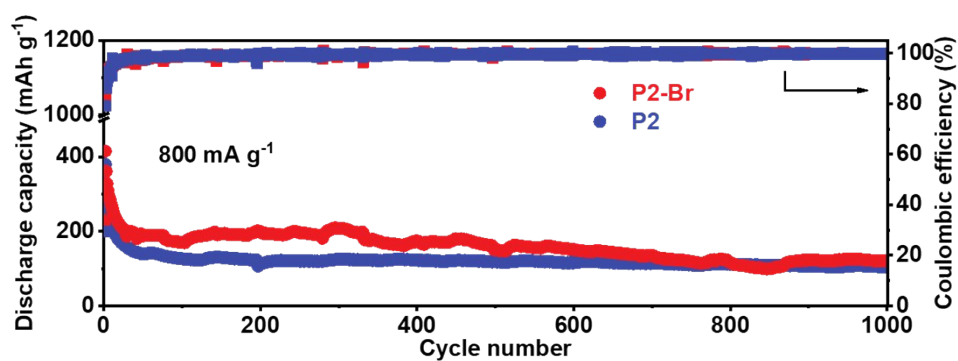

**Figure S39.** Long-term cycling property at  $800 \text{ mA g}^{-1}$  for **P2** and **P2-Br**.

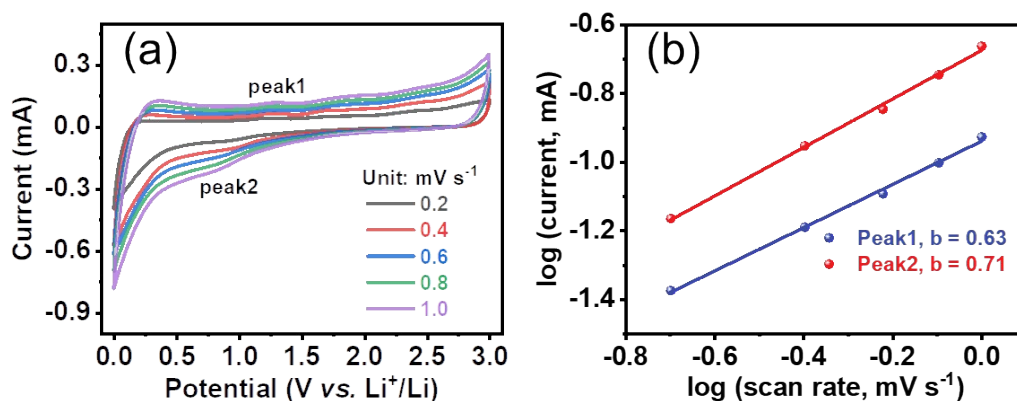

**Figure S40.** (a) CV curves of **P2** at different scan rates. (b) Log  $i$  versus log  $v$  plots of **P2** to determine the  $b$  values of different peaks.

The relation between measured peak current ( $i$ ) and scan rate ( $v$ ) obeys the following equations:  $i = av^b$  and  $\log(i) = b \times \log(v) + \log(a)$ , where  $a$  and  $b$  are adjustable parameters. The value of  $b$  is very important as it can provide information about the types of the charge storage mechanism, which can be determined by the slope of the  $\log(v)$ - $\log(i)$  plots. Specifically, if  $b = 0.5$ , the electrochemical process is an ideally diffusion-controlled behavior. When  $b$  equals to 1, there is an ideally capacitive process.

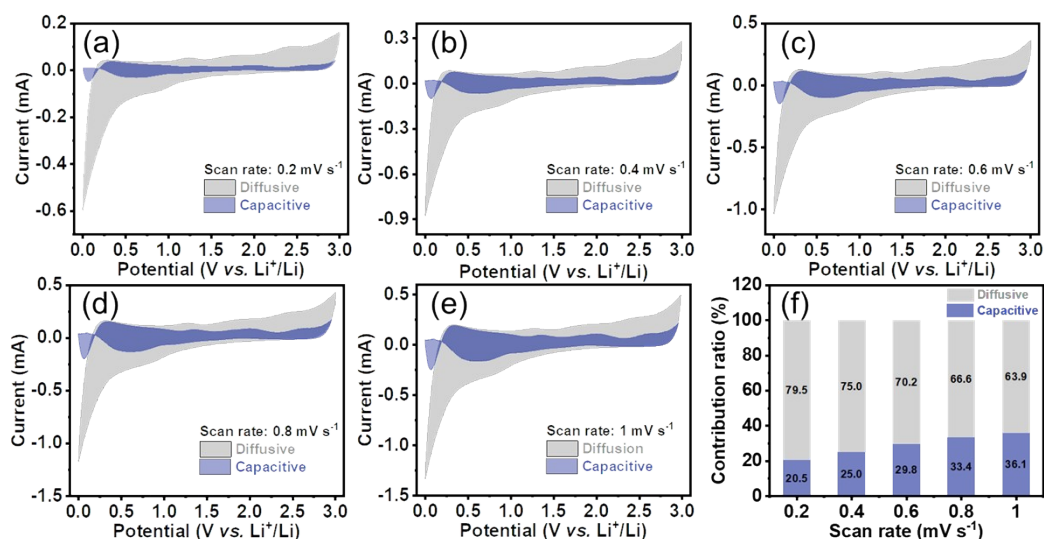

**Figure S41.** (a-e) Capacitive contribution of **P1** in CV curve at different scan rates. (f) The percentage contribution from capacitive and diffusive contribution of **P1**.

The specific percentage of capacitive and diffusive contribution can be further quantified by separating the current response ( $i$ ) at a fixed potential ( $V$ ) into capacitive contribution ( $k_1v$ ) and diffusion-controlled contribution ( $k_2v^{1/2}$ ) according to the equation:  $i(V) = k_1(v) + k_2(v^{1/2})$ , here  $k_1$  and  $k_2$  are constant for a given potential.

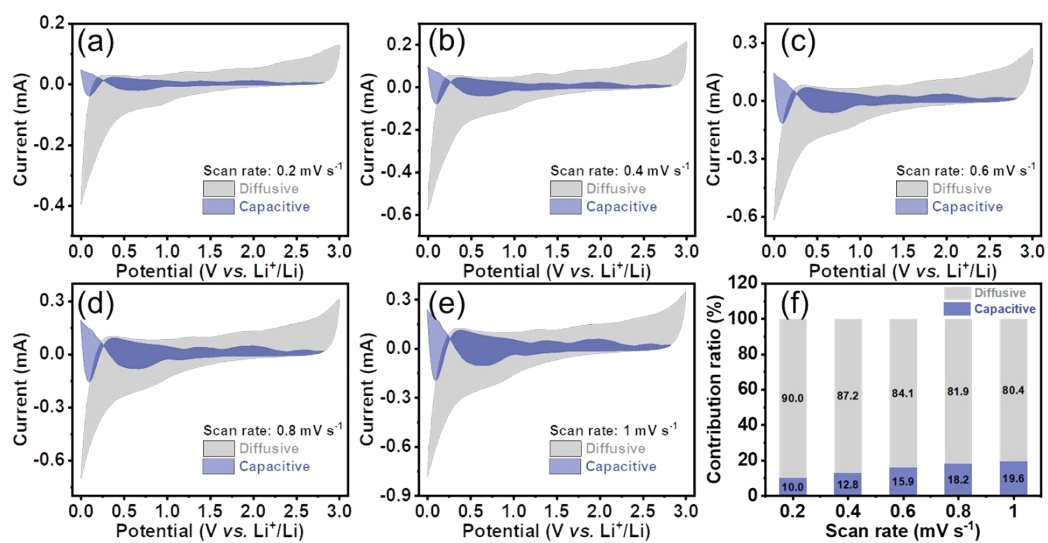

**Figure S42.** (a-e) Capacitive contribution of **P2** in CV curve at different scan rates. (f) The percentage contribution from capacitive and diffusive contribution of **P2**.

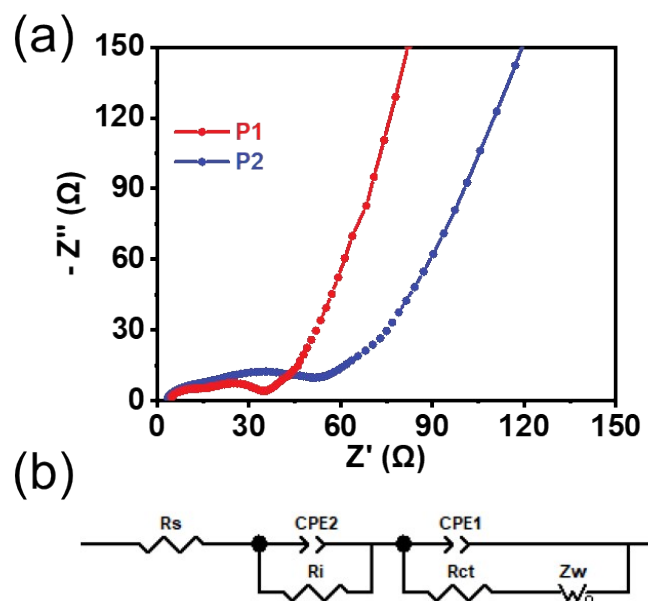

**Figure S43.** (a) Nyquist plots of **P1** and **P2** after 1000 cycles. (b) Equivalent circuit used for fitting the experimental data, where  $R_s$ ,  $R_i$ ,  $R_{ct}$ , CPE, and  $Z_w$  represent series resistance, interface resistance between electrolyte and deposited layer, charge-transfer resistance, constant-phase element, and Warburg diffusion process, respectively.

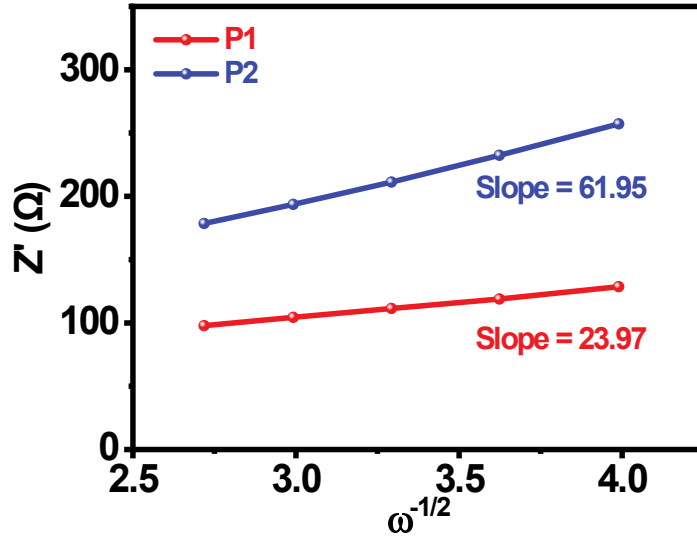

**Figure S44.** The relationship between real impedance in the low frequency range of **P1** and **P2** after 1000 cycles.

According to the equation:  $Z' = R_e + R_{ct} + \sigma_w \omega^{-1/2}$  and  $D_{Li^+} = \frac{R^2 T^2}{2 A^2 n^4 F^4 C^2 \sigma_w^2}$ , the  $\sigma_w$  value is the Warburg factor, which can be obtained from the slope of  $Z' - \omega^{-1/2}$  fitting line.

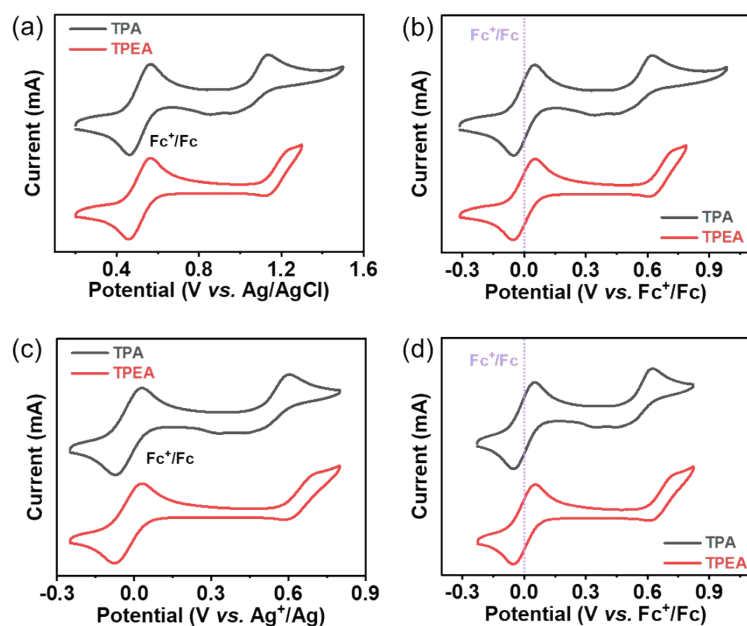

**Figure S45.** Cyclic voltammograms of tris(4-ethynylphenyl)-amine (TEPA) and triphenylamine (TPA) at  $100\text{ mV s}^{-1}$  in DMF solution with  $0.05\text{ M TBAPF}_6$  as supporting electrolyte by: (a) using Ag/AgCl as quasi-reference electrode and adding ferrocene; (b) using Ag/AgCl as quasi-reference electrode, potential E referenced to  $Fc^+/Fc$  (defined  $E_{1/2}(Fc^+/Fc)=0$ ); (c) using  $Ag^+/Ag$  as quasi-reference electrode and adding ferrocene; (d) using  $Ag^+/Ag$  as quasi-reference electrode, potential E referenced to  $Fc^+/Fc$  (defined  $E_{1/2}(Fc^+/Fc)=0$ ).

Organic compounds can be categorized as n-type, p-type or bipolar according to their redox mechanisms<sup>S7-S8</sup>. Most reported n-type organics including viologens first experience reduction, such as **P2** in our work, during which they combine with electrons and Li-ions. Conversely, p-type materials typically first undergo oxidation and must bind anions from the electrolyte to remain electroneutral. Triphenylamine derivatives are usually used as high-voltage ( $>3.2\text{V}$ , vs.  $Li^+/Li$ ) p-type electrode materials<sup>S9-S10</sup>.

We have measured the cyclic voltammograms of tris(4-ethynylphenyl)-amine (TEPA) and triphenylamine (TPA) in DMF, as shown in **Fig. S45**. The potentials of both compounds are above  $1.1\text{V}$  (vs. Ag/AgCl), which are much higher than the potentials of viologens (about  $-0.3\text{V}$ ). According to the CV profiles and previous

reported work<sup>S11</sup>, the capacity contribution for triphenylamine units in our polymer can be negligible.

However, we cannot totally rule out the capacity contribution of TEPA units in **P1**. Because TEPA part may contribute partial capacity due to the superlithium process during the cycling. In addition, the incorporation of electron-donating TEPA accelerates the charge transfer process, which is one of the most promising reasons for the excellent electrochemistry of **P1**.

**Table S1.** Crystal data and structure refinement for **3** (CCDC 2071615).

|                                             |                                                                                             |
|---------------------------------------------|---------------------------------------------------------------------------------------------|
| Identification code                         | <b>3</b>                                                                                    |
| Empirical formula                           | C <sub>15</sub> H <sub>11</sub> F <sub>3</sub> N <sub>2</sub> O <sub>4</sub> S <sub>2</sub> |
| Formula weight                              | 404.38                                                                                      |
| Temperature/K                               | 153.0                                                                                       |
| Crystal system                              | monoclinic                                                                                  |
| Space group                                 | C2/c                                                                                        |
| a/Å                                         | 16.4424(12)                                                                                 |
| b/Å                                         | 10.2099(8)                                                                                  |
| c/Å                                         | 20.8080(15)                                                                                 |
| $\alpha$ /°                                 | 90                                                                                          |
| $\beta$ /°                                  | 110.745(2)                                                                                  |
| $\gamma$ /°                                 | 90                                                                                          |
| Volume/Å <sup>3</sup>                       | 3266.7(4)                                                                                   |
| Z                                           | 8                                                                                           |
| $\rho_{\text{calc}}$ /cm <sup>3</sup>       | 1.644                                                                                       |
| $\mu$ /mm <sup>-1</sup>                     | 3.515                                                                                       |
| F(000)                                      | 1648.0                                                                                      |
| Crystal size/mm <sup>3</sup>                | 0.5 × 0.4 × 0.3                                                                             |
| Radiation                                   | CuK $\alpha$ ( $\lambda$ = 1.54178)                                                         |
| 2 $\Theta$ range for data collection/°      | 9.088 to 136.608                                                                            |
| Index ranges                                | -19 ≤ h ≤ 19, -12 ≤ k ≤ 12, -25 ≤ l ≤ 25                                                    |
| Reflections collected                       | 24564                                                                                       |
| Independent reflections                     | 2978 [ $R_{\text{int}}$ = 0.0473, $R_{\text{sigma}}$ = 0.0271]                              |
| Data/restraints/parameters                  | 2978/0/236                                                                                  |
| Goodness-of-fit on F <sup>2</sup>           | 1.054                                                                                       |
| Final R indexes [ $I \geq 2\sigma(I)$ ]     | $R_1$ = 0.0276, $wR_2$ = 0.0763                                                             |
| Final R indexes [all data]                  | $R_1$ = 0.0350, $wR_2$ = 0.0781                                                             |
| Largest diff. peak/hole / e Å <sup>-3</sup> | 0.32/-0.33                                                                                  |

**Table S2.** Bond Lengths for **3**.

| Atom | Atom            | Length/Å   | Atom | Atom            | Length/Å   |
|------|-----------------|------------|------|-----------------|------------|
| S1   | O1              | 1.4376(11) | N2   | C7              | 1.4466(18) |
| S1   | O2              | 1.4425(11) | N2   | C8              | 1.3583(18) |
| S1   | O3              | 1.4425(10) | C1   | C2              | 1.367(2)   |
| S1   | C14             | 1.8298(17) | C1   | C3              | 1.3920(19) |
| S2   | C5 <sup>1</sup> | 1.7572(14) | C3   | C4              | 1.4011(19) |
| S2   | C9              | 1.7194(14) | C3   | C5              | 1.454(2)   |
| F1   | C14             | 1.332(2)   | C4   | C8              | 1.369(2)   |
| F2   | C14             | 1.331(2)   | C6   | C10             | 1.395(2)   |
| F3   | C14             | 1.3300(19) | C6   | C11             | 1.376(2)   |
| O4   | C10             | 1.3618(18) | C7   | C11             | 1.395(2)   |
| O4   | C15             | 1.436(2)   | C7   | C12             | 1.386(2)   |
| N1   | C5              | 1.3164(18) | C9   | C9 <sup>1</sup> | 1.382(3)   |
| N1   | C9              | 1.3527(19) | C10  | C13             | 1.389(2)   |
| N2   | C2              | 1.3552(18) | C12  | C13             | 1.387(2)   |

**Table S3** Bond Angles for **3**.

| Atom | Atom | Atom            | Angle/°    | Atom            | Atom | Atom            | Angle/°    |
|------|------|-----------------|------------|-----------------|------|-----------------|------------|
| O1   | S1   | O2              | 114.81(6)  | C11             | C6   | C10             | 120.61(13) |
| O1   | S1   | O3              | 115.37(7)  | C11             | C7   | N2              | 120.68(12) |
| O1   | S1   | C14             | 103.87(7)  | C12             | C7   | N2              | 119.21(12) |
| O2   | S1   | C14             | 102.89(8)  | C12             | C7   | C11             | 120.03(13) |
| O3   | S1   | O2              | 114.92(7)  | N2              | C8   | C4              | 121.35(13) |
| O3   | S1   | C14             | 102.48(7)  | N1              | C9   | S2              | 132.55(11) |
| C9   | S2   | C5 <sup>1</sup> | 87.88(7)   | N1              | C9   | C9 <sup>1</sup> | 118.06(16) |
| C10  | O4   | C15             | 117.25(13) | C9 <sup>1</sup> | C9   | S2              | 109.38(14) |
| C5   | N1   | C9              | 108.11(12) | O4              | C10  | C6              | 115.80(13) |
| C2   | N2   | C7              | 119.84(11) | O4              | C10  | C13             | 124.57(13) |
| C2   | N2   | C8              | 119.51(12) | C13             | C10  | C6              | 119.63(14) |
| C8   | N2   | C7              | 120.47(11) | C6              | C11  | C7              | 119.57(13) |
| C2   | C1   | C3              | 120.44(13) | C7              | C12  | C13             | 120.22(13) |
| N2   | C2   | C1              | 121.04(13) | C12             | C13  | C10             | 119.84(14) |
| C1   | C3   | C4              | 117.72(13) | F1              | C14  | S1              | 110.99(12) |
| C1   | C3   | C5              | 121.77(13) | F2              | C14  | S1              | 111.43(13) |
| C4   | C3   | C5              | 120.48(13) | F2              | C14  | F1              | 107.22(13) |
| C8   | C4   | C3              | 119.79(13) | F3              | C14  | S1              | 111.61(10) |
| N1   | C5   | S2 <sup>1</sup> | 116.56(11) | F3              | C14  | F1              | 107.74(15) |
| N1   | C5   | C3              | 122.58(12) | F3              | C14  | F2              | 107.65(14) |
| C3   | C5   | S2 <sup>1</sup> | 120.83(10) |                 |      |                 |            |

**Table S4.** Torsion Angles for **3**.

| <b>A</b> | <b>B</b> | <b>C</b> | <b>D</b>        | <b>Angle/°</b> | <b>A</b>        | <b>B</b> | <b>C</b> | <b>D</b>        | <b>Angle/°</b> |
|----------|----------|----------|-----------------|----------------|-----------------|----------|----------|-----------------|----------------|
| O1       | S1       | C14      | F1              | 179.58(11)     | C4              | C3       | C5       | N1              | 3.0(2)         |
| O1       | S1       | C14      | F2              | 60.16(12)      | C5 <sup>1</sup> | S2       | C9       | N1              | 179.53(14)     |
| O1       | S1       | C14      | F3              | -60.23(15)     | C5 <sup>1</sup> | S2       | C9       | C9 <sup>1</sup> | 0.33(13)       |
| O2       | S1       | C14      | F1              | -60.43(13)     | C5              | N1       | C9       | S2              | -179.83(11)    |
| O2       | S1       | C14      | F2              | -179.85(11)    | C5              | N1       | C9       | C9 <sup>1</sup> | -0.7(2)        |
| O2       | S1       | C14      | F3              | 59.77(14)      | C5              | C3       | C4       | C8              | -174.91(13)    |
| O3       | S1       | C14      | F1              | 59.13(13)      | C6              | C10      | C13      | C12             | -2.7(2)        |
| O3       | S1       | C14      | F2              | -60.29(13)     | C7              | N2       | C2       | C1              | -172.86(12)    |
| O3       | S1       | C14      | F3              | 179.33(13)     | C7              | N2       | C8       | C4              | 172.18(13)     |
| O4       | C10      | C13      | C12             | 177.57(15)     | C7              | C12      | C13      | C10             | 1.5(2)         |
| N2       | C7       | C11      | C6              | 173.57(13)     | C8              | N2       | C2       | C1              | 2.3(2)         |
| N2       | C7       | C12      | C13             | -175.36(14)    | C8              | N2       | C7       | C11             | 154.76(13)     |
| C1       | C3       | C4       | C8              | 3.3(2)         | C8              | N2       | C7       | C12             | -28.55(19)     |
| C1       | C3       | C5       | S2 <sup>1</sup> | 2.99(18)       | C9              | N1       | C5       | S2 <sup>1</sup> | 0.39(15)       |
| C1       | C3       | C5       | N1              | -175.10(12)    | C9              | N1       | C5       | C3              | 178.57(12)     |
| C2       | N2       | C7       | C11             | -30.13(19)     | C10             | C6       | C11      | C7              | 1.9(2)         |
| C2       | N2       | C7       | C12             | 146.56(14)     | C11             | C6       | C10      | O4              | -179.30(13)    |
| C2       | N2       | C8       | C4              | -3.0(2)        | C11             | C6       | C10      | C13             | 0.9(2)         |
| C2       | C1       | C3       | C4              | -3.9(2)        | C11             | C7       | C12      | C13             | 1.4(2)         |
| C2       | C1       | C3       | C5              | 174.23(13)     | C12             | C7       | C11      | C6              | -3.1(2)        |
| C3       | C1       | C2       | N2              | 1.2(2)         | C15             | O4       | C10      | C6              | 177.18(16)     |
| C3       | C4       | C8       | N2              | 0.1(2)         | C15             | O4       | C10      | C13             | -3.1(2)        |
| C4       | C3       | C5       | S2 <sup>1</sup> | -178.89(10)    |                 |          |          |                 |                |

**Table S5.** Emission quantum yield of **1-4** in different solvents.<sup>a</sup>

|          | CH <sub>2</sub> Cl <sub>2</sub> | THF    | CH <sub>3</sub> CN | MeOH | DMF               |
|----------|---------------------------------|--------|--------------------|------|-------------------|
| <b>1</b> | 0.60                            | 0.023  | 0.67               | 0.51 | n.d. <sup>b</sup> |
| <b>2</b> | 0.36                            | 0.019  | 0.48               | 0.43 | n.d. <sup>b</sup> |
| <b>3</b> | 0.0045                          | 0.0003 | n.d.               | n.d. | n.d. <sup>b</sup> |
| <b>4</b> | n.d.                            | 5.2    | 0.62               | 0.85 | 0.0033            |

*a.* The absolute quantum yields were measured by the integrating sphere method.

*b.* Signal was too weak to be detected.

**Table S6.** The optimized structures and HOMO/LUMO for **1-4**.

All DFT calculations were carried out using the Gaussian 09 program package. The geometries of **1-4** were fully optimized at the B3LYP/6-31G(d) level of theory in CH<sub>3</sub>CN utilizing the polarizable continuum model (PCM) solvation model for compounds **1-4**.

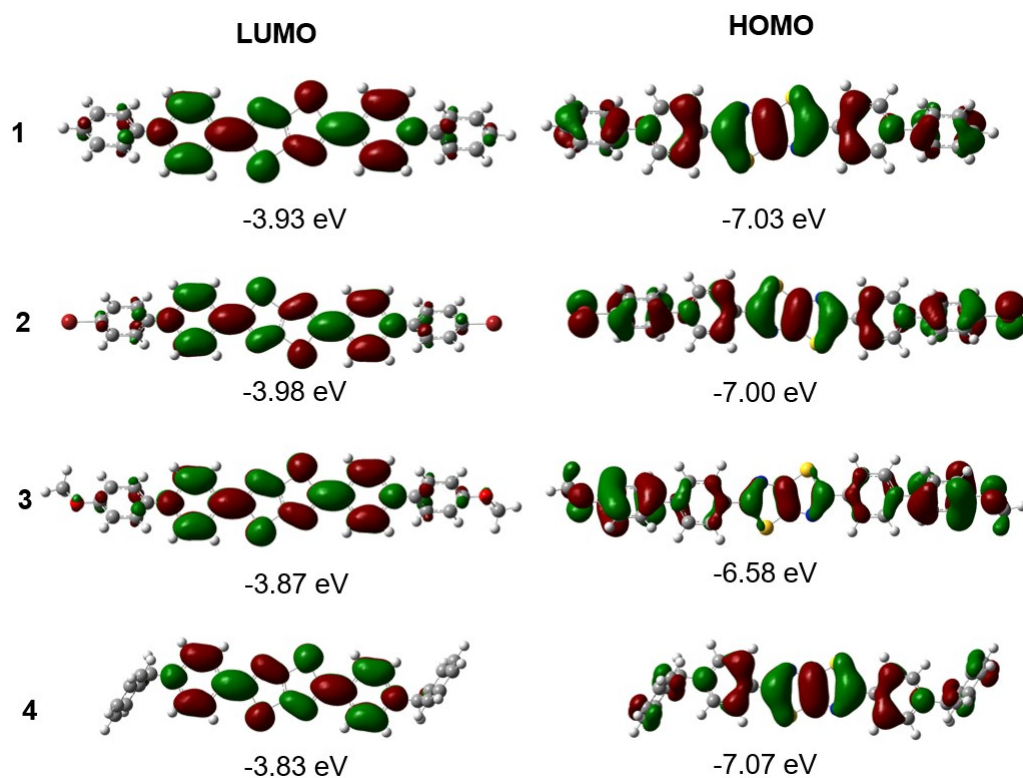

**Table S7.** Capacity retention of **P1**, **P2-Br** and **P2** in different cycles.

| Sample       | Current density<br>(mA g <sup>-1</sup> ) | Discharge capacity (mAh g <sup>-1</sup> ) |        | Capacity<br>retention (%) |
|--------------|------------------------------------------|-------------------------------------------|--------|---------------------------|
|              |                                          | 2nd                                       | 1000th |                           |
| <b>P1</b>    | 800                                      | 357.9                                     | 358.8  | <b>100.2</b>              |
|              | 1000                                     | 327.5                                     | 326.9  | <b>99.8</b>               |
| <b>P2-Br</b> | 800                                      | 415.4                                     | 120.8  | 29.1                      |
| <b>P2</b>    | 800                                      | 379.6                                     | 105.1  | 27.7                      |

**Table S8.** Simulation parameters obtained by fitting the impedance spectra to the equivalent circuit.

| Sample    | State             | R <sub>s</sub> | R <sub>i</sub> | R <sub>ct</sub> |
|-----------|-------------------|----------------|----------------|-----------------|
| <b>P1</b> | Fresh             | 1.579          | -              | 77.22           |
|           | after 1000 cycles | 3.965          | 14.46          | 25.04           |
| <b>P2</b> | Fresh             | 1.296          | -              | 210.80          |
|           | after 1000 cycles | 2.840          | 19.47          | 59.40           |

**Table S9.** Cycling performance comparison of **P1** and other organic electrodes.

| Materials                                                                           | Electrode Composition                         | Voltage Range (V vs Li/Li <sup>+</sup> ) | Capacity and Capacity Retention                                                        | Reference        |
|-------------------------------------------------------------------------------------|-----------------------------------------------|------------------------------------------|----------------------------------------------------------------------------------------|------------------|
| 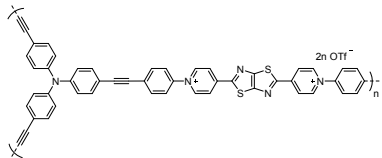   | active materials:<br>ECP-600JD:<br>PVDF=6:3:1 | 0.005-3.0                                | 358.8 mAh g <sup>-1</sup> ,<br>100.2%<br>(at 800 mA g <sup>-1</sup> after 1000 cycles) | <b>This work</b> |
|    | active materials:<br>ECP-600JD:<br>PVDF=6:3:1 | 0.005-3.0                                | 105.1 mAh g <sup>-1</sup> ,<br>27.7%<br>(at 800 mA g <sup>-1</sup> after 1000 cycles)  | <b>This work</b> |
|    | active materials:<br>Super P:<br>PVDF=8:1:1   | 1.6-4.0                                  | 218 mAh g <sup>-1</sup> ,<br>96%<br>(at 0.5C after 200 cycles)                         | S12              |
|  | active materials:<br>Super P:<br>PVDF=8:1:1   | 1.6-3.0                                  | ~125 mAh g <sup>-1</sup> ,<br>98%<br>(at 0.5C after 200 cycles)                        | S12              |
|  | active materials:<br>SWCNT:<br>PVDF=4:4:2     | 2.0-4.5                                  | ~25 mAh g <sup>-1</sup> ,<br>~100%<br>(at 1C after 120 cycles)                         | S13              |
|  | active materials:<br>PVDF=8:2                 | 1.95-3.5                                 | 53 mAh g <sup>-1</sup> ,<br>110%<br>(at 1C after 500 cycles)                           | S14              |
|  | active materials:<br>Norit 100:<br>PVDF=4:9:3 | 1.8-3.1                                  | 60 mAh g <sup>-1</sup> ,<br>82%<br>(at 1C after 70 cycles)                             | S15              |
|  | active materials:<br>Norit 100:<br>PVDF=4:9:3 | 1.8-3.2                                  | 40 mAh g <sup>-1</sup> ,<br>84%<br>(at 1.5C after 150 cycles)                          | S16              |

|                                                                                     |                                                     |           |                                                                                    |     |
|-------------------------------------------------------------------------------------|-----------------------------------------------------|-----------|------------------------------------------------------------------------------------|-----|
| 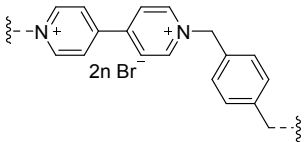   | active materials:<br>carbon blank:<br>PVDF=6:3:1    | 0.001-3.0 | 326 mAh g <sup>-1</sup> ,<br>66%<br>(at 100 mA g <sup>-1</sup><br>after 40 cycles) | S16 |
|    | active materials:<br>carbon blank:<br>PVDF=6:3:1    | 0.001-3.0 | 416 mAh g <sup>-1</sup> ,<br>57%<br>(at 100 mA g <sup>-1</sup><br>after 40 cycles) | S16 |
|    | active materials:<br>carbon blank:<br>PVDF=6:3:1    | 0.001-3.0 | 462 mAh g <sup>-1</sup> ,<br>72%<br>(at 100 mA g <sup>-1</sup><br>after 40 cycles) | S16 |
|    | active materials:<br>carbon blank:<br>PVDF=6:3:1    | 0.001-3.0 | 502 mAh g <sup>-1</sup> ,<br>73%<br>(at 100 mA g <sup>-1</sup><br>after 40 cycles) | S16 |
|   | active materials:<br>MWCNTs:<br>PVDF=5:4:1          | 1.5-3.5   | 46.7 mAh g <sup>-1</sup> ,<br>57%<br>(at 2C after<br>9000 cycles)                  | S17 |
|  | active materials:<br>acetylene black:<br>PVDF=4:5:1 | 1.5-4.2   | 125 mAh g <sup>-1</sup> ,<br>87%<br>(at 0.1C after<br>100 cycles)                  | S18 |

## Reference:

- S1.** Woodward, A. N.; Kolesar, J. M.; Hall, S. R.; Saleh, N. A.; Jones, D. S.; Walter, M. G. Thiazolothiazole Fluorophores Exhibiting Strong Fluorescence and Viologen-Like Reversible Electrochromism. *J. Am. Chem. Soc.* **2017**, *139* (25), 8467-8473.
- S2.** Bielawski, M.; Zhu, M.; Olofsson, B. Efficient and General One-Pot Synthesis of Diaryliodonium Triflates: Optimization, Scope and Limitations. *Adv. Synth. Catal.* **2007**, 349, 2610-2618.
- S3.** Corte, D. A. D.; Caillon, G.; Jordy, C.; Chazalviel, J.; Rosso, M.; Ozanam, F. Spectroscopic Insight into Li-Ion Batteries during Operation: An Alternative Infrared Approach. *Adv. Energy Mater.*, **2016**, *6* (2), 1501768.
- S4.** Zhao, C.; Chen, Z.; Wang, W.; Xiong, P.; Li, B.; Li, M.; Yang, J.; Xu, Y. In Situ Electropolymerization Enables Ultrafast Long Cycle Life and High-Voltage Organic Cathodes for Lithium Batteries. *Angew. Chem. Int. Ed.* **2020**, *59*(29), 11992-11998.
- S5.** Man, Z.; Li, P.; Zhou, D.; Zang, R.; Wang, S.; Li, P.; Liu, S.; Li, X.; Wu, Y.; Liang X.; Wang G. High-performance lithium-organic batteries by achieving 16 lithium storage in poly(imine-anthraquinone). *J. Mater. Chem. A*, **2019**, *7*(5), 2368-2375.
- S6.** Jiang, Q.; Xiong, P.; Liu, J.; Xie, Z.; Wang, Q.; Yang, X.-Q.; Hu, E.; Cao, Y.; Sun, J.; Xu, Y.; Chen, L. A Redox-Active 2D Metal–Organic Framework for Efficient Lithium Storage with Extraordinary High Capacity. *Angew. Chem. Int. Ed.*, **2020**, *59*(13), 5273-5277.
- S7.** Lu, Y.; Chen, J. Prospects of organic electrode materials for practical lithium batteries. *Nat. Rev. Chem.*, **2020**, *4*, 127-142.
- S8.** Sun, T.; Xie, J.; Guo, W.; Li, D.-S.; Zhang, Q. Covalent–Organic Frameworks: Advanced Organic Electrode Materials for Rechargeable Batteries. *Adv. Energy Mater.*, **2020**, *10*(19), 1904199.
- S9.** Su, C.; He, H.; Xu, L.; Zhao, K.; Zheng, C.; Zhang, C. A mesoporous conjugated polymer based on a high free radical density polytriphenylamine derivative: its preparation and electrochemical performance as a cathode material for Li-ion batteries. *J. Mater. Chem. A*, **2017**, *5*(6), 2701-2709.
- S10.** Choi, J.; Kim, E. S.; Ko, J. H.; Lee, S. M.; Kim, H. J.; Ko, Y.-J.; Son, S. U. Hollow and microporous triphenylamine networks post-modified with TCNE for enhanced organocathode performance. *Chem. Commun.*, **2017**, *53*(62), 8778-8781.
- S11.** Wang, G.; Chandrasekhar, N.; Biswal, B. P.; Becker, D.; Paasch, S.; Brunner, E.; Addicoat, M.; Yu, M.; Berger, R.; Feng, X. A Crystalline, 2D Polyarylimide Cathode for Ultrastable and Ultrafast Li Storage. *Adv. Mater.*, **2019**, *31*(28), 1901478.
- S12.** Ma, T.; Liu, L.; Wang, J.; Lu, Y.; Chen, J. Charge Storage Mechanism and Structural Evolution of Viologen Crystals as the Cathode of Lithium Batteries. *Angew. Chem. Int. Ed.* **2020**, *59* (28), 11533-11539.
- S13.** Bridges, C. R.; Borys, A. M.; Béland, V. A.; Gaffen, J. R.; Baumgartner, T. Phosphoryl- and phosphonium-bridged viologens as stable two- and three-electron acceptors for organic electrodes. *Chem. Sci.* **2020**, *11* (38), 10483-10487.

- S14.** Bridges, C. R.; Stolar, M.; Baumgartner, T. Phosphaviologen-Based Pyrene-Carbon Nanotube Composites for Stable Battery Electrodes. *Batteries Supercaps* **2019**, 3 (3), 268-274.
- S15.** Stolar, M.; Reus, C.; Baumgartner, T., Xylene-Bridged Phosphaviologen Oligomers and Polymers as High-Performance Electrode-Modifiers for Li-Ion Batteries. *Adv. Energy Mater.* **2016**, 6 (20), 1600944.
- S16.** Li, G.; Zhang, B.; Wang, J.; Zhao, H.; Ma, W.; Xu, L.; Zhang, W.; Zhou, K.; Du, Y.; He, G. Electrochromic Poly(chalcogenoviologen)s as Anode Materials for High-Performance Organic Radical Lithium-Ion Batteries. *Angew. Chem. Int. Ed.* **2019**, 58 (25), 8468-8473.
- S17.** Molina, A.; Patil, N.; Ventosa, E.; Liras, M.; Palma, J.; Marcilla, R. New Anthraquinone-Based Conjugated Microporous Polymer Cathode with Ultrahigh Specific Surface Area for High-Performance Lithium-Ion Batteries. *Adv. Funct. Mater.* **2019**, 30 (6), 1908074
- S18.** Chen, S.; Jia, T.; Zhou, G.; Zhang, C.; Hou, Q.; Wang, Y.; Luo, S.; Shi, G.; Zeng, Y., A Cross-Linked Triphenylamine-Based Polymer Cathode Material with Dual Anion-Cation Reversible Insertion for Lithium Ion Battery. *J. Electrochem. Soc.* **2019**, 166 (12), A2543-A2548.
